# Supplementary material for: Formation pathways of metal–organic frameworks proceeding through partial dissolution of the metastable phase
Source: Royal Society of Chemistry journal article supplement (doi:10.1039/c7ce00589j), 2017-01-01
Supplement: c7ce00589j1.pdf [file c7ce00589j1.pdf]

Anderson et al.

## Supporting Information

### Formation Pathways of Metal Organic Frameworks Proceeding Through Partial Dissolution of the Metastable Phase

Samantha L. Anderson,<sup>a</sup> Andrzej Gładysiak,<sup>a</sup> Peter G. Boyd,<sup>a</sup> Christopher P. Ireland,<sup>a</sup> Pascal Miéville,<sup>b</sup> Davide Tiana,<sup>a</sup> Bess Vlasisavljevich,<sup>c</sup> Pascal Schouwink,<sup>b</sup> Wouter van Beek,<sup>d</sup> Kevin J. Gagnon,<sup>e</sup> Berend Smit<sup>a,c</sup> and Kyriakos C. Stylianou<sup>a\*</sup>

<sup>a</sup>Laboratory for Molecular Simulations (LSMO), Institut des Sciences et Ingénierie Chimiques (ISIC), École Polytechnique Fédérale de Lausanne (EPFL Valais Wallis), Rue de l'Industrie 17, CH-1951 Sion, Switzerland

<sup>b</sup>Institut des Sciences et Ingénierie Chimiques (ISIC), École Polytechnique Fédérale de Lausanne (EPFL), CH-1015, Lausanne, Switzerland

<sup>c</sup>Department of Chemical and Biomolecular Engineering, University of California, Berkeley 94720, USA

<sup>d</sup>Swiss-Norwegian Beamlines at ESRF, BP 220, Grenoble, France

<sup>e</sup>Advanced Light Source, Lawrence Berkeley National Laboratory, Berkeley, California, 94720, USA

\*email: [kyriakos.stylianou@epfl.ch](mailto:kyriakos.stylianou@epfl.ch)

## Table of Contents

|                                                                                          |           |
|------------------------------------------------------------------------------------------|-----------|
| <b>S1 Experimental</b> .....                                                             | <b>3</b>  |
| 1.1 Materials and Characterization Methods.....                                          | 3         |
| 1.2 Synthesis of <b>SION-1</b> and <b>SION-2</b> .....                                   | 3         |
| 1.3 Water loaded <b>SION-1</b> and <b>SION-2</b> .....                                   | 4         |
| <b>S2 Single crystal X-ray diffraction</b> .....                                         | <b>5</b>  |
| 2.1 Crystal data for <b>SION-2</b> .....                                                 | 5         |
| 2.2 Crystal data for <b>SION-1</b> .....                                                 | 12        |
| 2.3 Crystal data for <b>SION-2@H<sub>2</sub>O</b> .....                                  | 17        |
| 2.4 Crystal data for <b>SION-1@H<sub>2</sub>O</b> .....                                  | 21        |
| <b>S3 Structural Topologies of <b>SION-2</b> and <b>SION-1</b></b> .....                 | <b>25</b> |
| <b>S4 Solid state Characterisation</b> .....                                             | <b>26</b> |
| 4.1 Phase purity .....                                                                   | 26        |
| 4.2 Thermogravimetric Analysis .....                                                     | 29        |
| 4.3 Effects of Concentration on Formation of <b>SION-2</b> and <b>SION-1</b> .....       | 30        |
| 4.4 Effects of Time on the Formation of <b>SION-2</b> and <b>SION-1</b> .....            | 30        |
| 4.5 <b>SION-2</b> to <b>SION-1</b> (direct, 72hrs) .....                                 | 31        |
| 4.6 Single-crystal to Single-crystal transformation test: Wet vs Dry <b>SION-2</b> ..... | 31        |
| <b>S5 In-situ <sup>1</sup>H NMR experiments</b> .....                                    | <b>33</b> |
| 5.1 <b>SION-2</b> to <b>SION-1</b> transformation for NMR comparison .....               | 33        |
| <b>S6 ICMPS</b> .....                                                                    | <b>36</b> |
| <b>S7 In situ PXRD study</b> .....                                                       | <b>36</b> |
| <b>S8 Computational methods</b> .....                                                    | <b>36</b> |
| <b>S9 References</b> .....                                                               | <b>37</b> |

## S1 Experimental

### S1.1 Materials and Characterization Methods

All chemicals were purchased from Sigma Aldrich ( $\text{Tb}(\text{NO}_3)_3 \cdot (\text{H}_2\text{O})_6$ ,  $\text{H}_2\text{DHBDC}$ ), and Carl Roth (DMF) and used without further purification. Elemental analyses were performed on a Thermo Scientific Flash 2000 Organic Elemental Analyzer. Infrared spectra were collected on a Perkin Elmer FT-IR/FIR Frontier Spectrometer from 400 to  $4000\text{ cm}^{-1}$ . Thermogravimetric analysis (TGA) was performed under  $\text{N}_2$  on a TGA Q 500, V20.13 with a balance gas flow of 10 mL/min and a sample gas flow of 25 mL/min. All samples were analyzed with a ramp of  $5\text{ }^\circ\text{C}/\text{min}$ . to  $950\text{ }^\circ\text{C}$  followed by an isothermal hold for 15 minutes before cooling down. Powder X-ray diffraction data were collected on a Bruker D8 Advanced using  $\text{Cu K}\alpha$  radiation ( $\lambda = 1.5418\text{ \AA}$ , 50 kW/40mA). Single crystal X-ray diffraction data were collected on a Bruker D8 Venture using  $\text{Mo K}\alpha$  ( $\lambda = 0.71\text{ \AA}$ ). Simulated powder X-ray diffraction patterns were generated from the single crystal data using Mercury 3.0.  $^1\text{H}$  NMR spectra and *in-situ* experiments were collected on a 400 MHz Bruker NMR. Inductively coupled plasma mass spectrometry was performed on a Perkin Elmer ICPMS nexION 350D spectrometer.

### S1.2 Synthesis of SION-1 and SION-2

Synthesis of **SION-2**:  $\text{H}_2\text{DHBDC}$  (20 mg) and  $\text{Tb}(\text{NO}_3)_3 \cdot 6\text{H}_2\text{O}$  (20 mg) were mixed in a 12 mL vial. 2 mL of DMF was added, and stirred until the entire solution was clear. Following this, 0.5 mL of  $\text{H}_2\text{O}$  was added and the scintillation vial was capped, and shaken to ensure the solution is homogeneous. The vials were placed in an oven and heated at  $120\text{ }^\circ\text{C}$ , for 24 hrs with a temperature ramp of  $2.0\text{ }^\circ\text{C}$ , and cooling ramp of  $0.2\text{ }^\circ\text{C}$  (67 % yield based on  $\text{Tb}(\text{III})$ ). The formula of **SION-2** was determined to be  $[\text{Tb}_2(\text{DHBDC})_3(\text{DMF})_4] \cdot 2\text{DMF}$  on the basis of the combined results of single-crystal X-ray diffraction (SCXRD), thermogravimetric analysis (TGA) and elemental analysis (EA). Anal. Calcd for  $([\text{Tb}_2(\text{DHBDC})_3(\text{DMF})_4] \cdot 2\text{DMF})$  : C 37.51, H 3.05, N 6.25. Experimental: C 37.27, H 4.14, N 6.20.

Synthesis of **SION-1**: **SION-1** was synthesized following the same synthetic protocol with that of **SION-2** and the reaction was heated at 120 °C for 72 hrs (76 % yield based on Tb). The formula of the product was determined to be  $[\text{Tb}_2(\text{DHBDC})(\text{DOBDC})(\text{DMF})_2]$  (DOBDC = 2,5-dioxido-1,4-benzenedicarboxylate) on the basis of the combined results of SCXRD, TGA, and EA. Anal. Calcd for  $[\text{Tb}_2(\text{DHBDC})(\text{DOBDC})(\text{DMF})_2]$  : C 30.93, H 2.36, N 3.28. Experimental: C 28.34, H 2.44, N 3.34.

### **S1.3 Water loaded SION-1 and SION-2**

**SION-1** and **SION-2** crystals were immersed in liquid  $\text{H}_2\text{O}$  and their corresponding single crystals were analysed using Synchrotron radiation. The immersion of golden crystals of **SION-2** lead to an immediate color change to dull beige to form **SION-2@H<sub>2</sub>O**. Submersion of **SION-1** in  $\text{H}_2\text{O}$  lead to a color change from dark orange crystals to orange crystals to form **SION-1@H<sub>2</sub>O**. The formula of **SION-1@H<sub>2</sub>O** was determined to be  $[\text{Tb}_2(\text{DHBDC})(\text{DOBDC})(\text{H}_2\text{O})_2] \cdot 8\text{H}_2\text{O}$  as confirmed by SCXRD.

## S2 Single-crystal X-ray diffraction

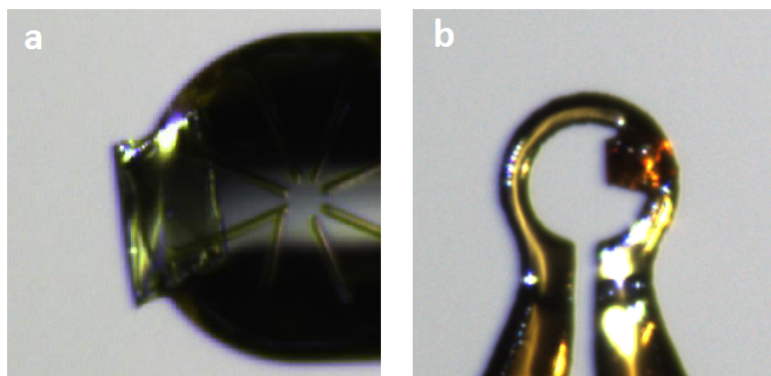

**Figure S1:** Microscopic images of **SION-2** (a) and **SION-1** (b) single crystals immobilized on polymer loops, ready for the diffraction experiments.

### S2.1 Crystal data for SION-2

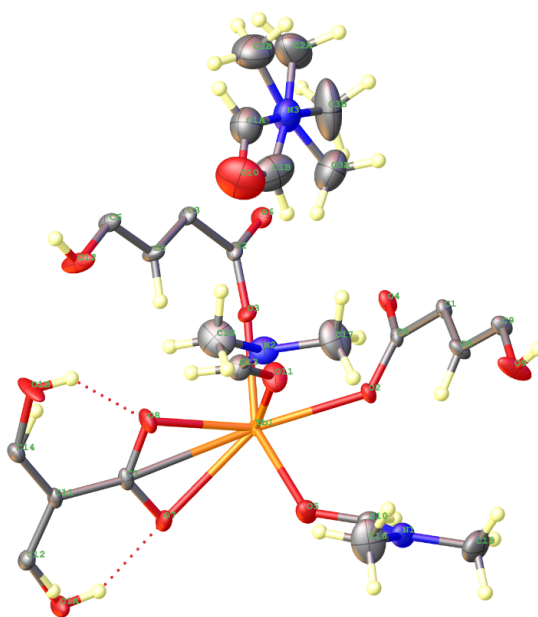

**Figure S2:** Asymmetric unit of the **SION-2** structure. The atomic displacement ellipsoids are set at a 50% probability level. Color scheme: Orange, Tb; red, O; grey, C; blue, N; yellow, H.

One light yellow single crystal of **SION-2** was isolated from the reaction mixture and mounted on a Bruker D8 Venture diffractometer equipped with a CMOS detector. Raw data were processed with Apex3 program suite,<sup>1</sup> and corrected for absorption with SADABS.<sup>2</sup> Crystal structure was solved with program SHELXS using direct methods and refined with SHELXL refinement package using least-squares minimization, implemented in the Olex2 program suite.<sup>3,4</sup>

Reflections:  $-1\ 0\ 1$ ,  $0\ -1\ 1$ , and  $-1\ 1\ 0$  were excluded from the refinement process due to their intensities disturbed by the beam stop. Atomic positions were found from the difference–Fourier maps and refined anisotropically for all non-H atoms. Positions of aromatic and amide H-atoms were refined using a riding model, while H-atoms in methyl and hydroxy groups were refined as in idealized rotating groups.  $U_{iso}$  for H-atoms were set to 1.2 times  $U_{eq}$  of neighboring atoms, and 1.5 times  $U_{eq}$  of atoms in terminating groups. Atoms C1A, C2A, C3A, and H-atoms bound to them were refined as a disordered group and were set to have the same site-occupancy factor (SOF). The same procedure was applied to the second component of the disorder: atoms C1B, C2B, C3B, and H-atoms bound to them. The sum of SOFs of these two atom groups was set to 1. Disorder over O1A and O1B atoms was refined independently in a similar way. Restraints on  $U_{ij}$  were imposed on O1B atom.

| <b>Table S1: Crystal data and structure refinement for SION-2.</b> |                                                                    |
|--------------------------------------------------------------------|--------------------------------------------------------------------|
| Identification code                                                | <b>SION-2</b>                                                      |
| Empirical formula                                                  | $C_{21}H_{27}N_3O_{12}Tb$                                          |
| Formula weight                                                     | 672.37                                                             |
| Temperature/K                                                      | 149.72                                                             |
| Crystal system                                                     | triclinic                                                          |
| Space group                                                        | $P-1$                                                              |
| $a/\text{\AA}$                                                     | 10.4608(8)                                                         |
| $b/\text{\AA}$                                                     | 10.9006(10)                                                        |
| $c/\text{\AA}$                                                     | 12.5293(10)                                                        |
| $\alpha/^\circ$                                                    | 104.610(5)                                                         |
| $\beta/^\circ$                                                     | 107.840(4)                                                         |
| $\gamma/^\circ$                                                    | 97.204(4)                                                          |
| Volume/ $\text{\AA}^3$                                             | 1283.78(19)                                                        |
| Z                                                                  | 2                                                                  |
| $\rho_{calc}/\text{g/cm}^3$                                        | 1.739                                                              |
| $\mu/\text{mm}^{-1}$                                               | 2.821                                                              |
| $F(000)$                                                           | 670.0                                                              |
| Crystal size/ $\text{mm}^3$                                        | $0.221 \times 0.146 \times 0.059$                                  |
| Radiation                                                          | MoK $\alpha$ ( $\lambda = 0.71073$ )                               |
| $2\theta$ range for data collection/ $^\circ$                      | 5.84 to 56.644                                                     |
| Index ranges                                                       | $-13 \leq h \leq 13$ , $-14 \leq k \leq 14$ , $-16 \leq l \leq 16$ |
| Reflections collected                                              | 38205                                                              |
| Independent reflections                                            | 6365 [ $R_{int} = 0.0389$ , $R_{sigma} = 0.0244$ ]                 |
| Data/restraints/parameters                                         | 6365/6/383                                                         |
| Goodness-of-fit on $F^2$                                           | 1.080                                                              |
| Final R indexes [ $I \geq 2\sigma(I)$ ]                            | $R_1 = 0.0180$ , $wR_2 = 0.0421$                                   |
| Final R indexes [all data]                                         | $R_1 = 0.0211$ , $wR_2 = 0.0433$                                   |

*Anderson et al.*

|                                             |            |
|---------------------------------------------|------------|
| Largest diff. peak/hole / e Å <sup>-3</sup> | 0.70/-1.06 |
|---------------------------------------------|------------|

**Table S2:** Fractional Atomic Coordinates ( $\times 10^4$ ) and Equivalent Isotropic Displacement Parameters ( $\text{\AA}^2 \times 10^3$ ) for Sion-

2  $U_{eq}$  is defined as 1/3 of the trace of the orthogonalised  $U_{ij}$  tensor.

| Atom | x          | y           | z          | $U_{eq}$ |
|------|------------|-------------|------------|----------|
| Tb1  | 952.4(2)   | 5464.8(2)   | 6825.2(2)  | 9.36(3)  |
| O2   | -352.2(14) | 3348.5(13)  | 5866.9(12) | 14.7(3)  |
| O3   | 1549.2(14) | 4861.7(14)  | 5170.5(13) | 16.1(3)  |
| O4   | -815.8(15) | 2732.9(13)  | 3917.2(12) | 16.1(3)  |
| O5   | 573.7(16)  | 4840.6(15)  | 8409.7(13) | 22.1(3)  |
| O6   | 1299.9(14) | 4233.1(14)  | 3284.5(13) | 17.4(3)  |
| O7   | 1654.1(14) | 7630.4(14)  | 8496.5(12) | 18.2(3)  |
| O8   | 3205.8(15) | 6808.0(14)  | 7864.8(13) | 20.3(3)  |
| O9   | 450(2)     | -490.0(16)  | 7131.4(14) | 31.3(4)  |
| O11  | 2489.6(16) | 4054.6(16)  | 7339.3(15) | 26.9(4)  |
| O12  | 6600.9(16) | 6067(2)     | 7361.8(13) | 32.4(4)  |
| N1   | -129(2)    | 3086.0(19)  | 8918.5(17) | 24.8(4)  |
| O1A  | 2337.5(17) | 10053.1(17) | 9928.7(16) | 22.4(5)  |
| O1B  | 5955(14)   | 8009(15)    | 8823(15)   | 32(5)    |
| N2   | 4283(2)    | 3319(2)     | 8304.0(18) | 27.8(4)  |
| C1   | -262(2)    | 1208.2(18)  | 4928.7(17) | 13.2(4)  |
| C2   | 2058.8(19) | 4626.6(18)  | 4368.6(18) | 13.2(4)  |
| C3   | 3574.6(19) | 4814.4(19)  | 4679.7(17) | 13.5(4)  |
| C4   | -494.1(19) | 2524.8(18)  | 4908.6(17) | 12.3(4)  |
| C5   | 4421(2)    | 5356(2)     | 5856.6(17) | 17.2(4)  |
| C6   | 5841(2)    | 5537(2)     | 6190.7(17) | 17.6(4)  |
| C7   | 2880(2)    | 7718.4(19)  | 8507.1(17) | 13.9(4)  |
| C8   | -30(2)     | 908.6(19)   | 5975.5(18) | 17.5(4)  |
| C9   | 234(2)     | -282(2)     | 6068.4(18) | 17.3(4)  |
| C10  | -313(2)    | 3876(2)     | 8273.0(19) | 20.7(4)  |
| N3   | 4760(3)    | 1523(2)     | 4537(2)    | 40.2(5)  |
| C11  | 3962(2)    | 8908.4(19)  | 9280.4(16) | 13.7(4)  |
| C12  | 3636(2)    | 9983(2)     | 9948.6(17) | 15.5(4)  |
| C13  | 3703(2)    | 4229(2)     | 7954(2)    | 24.5(5)  |
| C14  | 5322(2)    | 8935.6(19)  | 9338.7(17) | 15.8(4)  |
| C15  | -1210(3)   | 1983(3)     | 8714(3)    | 40.1(7)  |
| O10  | 6063(3)    | 2237(3)     | 6482(2)    | 75.6(8)  |
| C16  | 1145(3)    | 3282(3)     | 9884(3)    | 51.8(8)  |
| C17  | 3528(3)    | 2008(3)     | 7969(3)    | 47.2(7)  |
| C18  | 5755(3)    | 3633(3)     | 9009(3)    | 48.7(8)  |
| C1A  | 5941(6)    | 1930(5)     | 5452(5)    | 50.3(14) |
| C2A  | 4693(7)    | 1129(6)     | 3336(5)    | 60.2(17) |
| C3A  | 3455(6)    | 1391(6)     | 4749(6)    | 59.2(16) |
| C1B  | 4961(13)   | 2021(12)    | 5664(11)   | 63(3)    |
| C2B  | 5984(13)   | 1424(12)    | 4172(11)   | 68(3)    |
| C3B  | 3435(13)   | 1200(12)    | 3586(12)   | 85(5)    |

**Table S3:** Bond Lengths for SION-2.

| Atom | Atom | Length/ $\text{\AA}$ | Atom | Atom | Length/ $\text{\AA}$ |
|------|------|----------------------|------|------|----------------------|
| Tb1  | O2   | 2.3313(14)           | N2   | C13  | 1.324(3)             |



|     |                  |            |  |     |                  |            |
|-----|------------------|------------|--|-----|------------------|------------|
| Tb1 | O3               | 2.3084(14) |  | N2  | C17              | 1.433(4)   |
| Tb1 | O4 <sup>1</sup>  | 2.3783(14) |  | N2  | C18              | 1.467(3)   |
| Tb1 | O5               | 2.3783(15) |  | C1  | C4               | 1.490(3)   |
| Tb1 | O6 <sup>1</sup>  | 2.3869(14) |  | C1  | C8               | 1.388(3)   |
| Tb1 | O7               | 2.5742(15) |  | C1  | C9 <sup>2</sup>  | 1.405(3)   |
| Tb1 | O8               | 2.3849(14) |  | C2  | Tb1 <sup>1</sup> | 3.0213(18) |
| Tb1 | O11              | 2.4183(15) |  | C2  | C3               | 1.486(2)   |
| Tb1 | C2 <sup>1</sup>  | 3.0213(19) |  | C3  | C5               | 1.392(3)   |
| Tb1 | C7               | 2.8432(19) |  | C3  | C6 <sup>3</sup>  | 1.402(3)   |
| O2  | C4               | 1.258(2)   |  | C5  | C6               | 1.387(3)   |
| O3  | C2               | 1.262(2)   |  | C6  | C3 <sup>3</sup>  | 1.402(3)   |
| O4  | Tb1 <sup>1</sup> | 2.3783(14) |  | C7  | C11              | 1.493(3)   |
| O4  | C4               | 1.270(2)   |  | C8  | C9               | 1.386(3)   |
| O5  | C10              | 1.250(3)   |  | C9  | C1 <sup>2</sup>  | 1.405(3)   |
| O6  | Tb1 <sup>1</sup> | 2.3869(14) |  | N3  | C1A              | 1.332(6)   |
| O6  | C2               | 1.272(2)   |  | N3  | C2A              | 1.434(6)   |
| O7  | C7               | 1.269(2)   |  | N3  | C3A              | 1.466(6)   |
| O8  | C7               | 1.264(2)   |  | N3  | C1B              | 1.317(12)  |
| O9  | C9               | 1.363(2)   |  | N3  | C2B              | 1.493(11)  |
| O11 | C13              | 1.228(3)   |  | N3  | C3B              | 1.456(11)  |
| O12 | C6               | 1.364(2)   |  | C11 | C12              | 1.404(3)   |
| N1  | C10              | 1.316(3)   |  | C11 | C14              | 1.398(3)   |
| N1  | C15              | 1.455(3)   |  | C12 | C14 <sup>4</sup> | 1.387(3)   |
| N1  | C16              | 1.447(3)   |  | C14 | C12 <sup>4</sup> | 1.388(3)   |
| O1A | C12              | 1.363(2)   |  | O10 | C1A              | 1.211(6)   |
| O1B | C14              | 1.406(13)  |  | O10 | C1B              | 1.233(13)  |

<sup>1</sup>-X,1-Y,1-Z; <sup>2</sup>-X,-Y,1-Z; <sup>3</sup>1-X,1-Y,1-Z; <sup>4</sup>1-X,2-Y,2-Z

| Table S4: Bond Angles for SION-2. |      |                  |            |  |                  |      |                  |            |
|-----------------------------------|------|------------------|------------|--|------------------|------|------------------|------------|
| Atom                              | Atom | Atom             | Angle/°    |  | Atom             | Atom | Atom             | Angle/°    |
| O2                                | Tb1  | O4 <sup>1</sup>  | 126.69(5)  |  | C10              | N1   | C16              | 121.9(2)   |
| O2                                | Tb1  | O5               | 78.25(5)   |  | C16              | N1   | C15              | 116.5(2)   |
| O2                                | Tb1  | O6 <sup>1</sup>  | 78.69(5)   |  | C13              | N2   | C17              | 121.9(2)   |
| O2                                | Tb1  | O7               | 151.35(5)  |  | C13              | N2   | C18              | 119.6(2)   |
| O2                                | Tb1  | O8               | 146.07(5)  |  | C17              | N2   | C18              | 118.4(2)   |
| O2                                | Tb1  | O11              | 74.04(5)   |  | C8               | C1   | C4               | 118.65(17) |
| O2                                | Tb1  | C2 <sup>1</sup>  | 67.36(5)   |  | C8               | C1   | C9 <sup>2</sup>  | 119.40(18) |
| O2                                | Tb1  | C7               | 163.41(5)  |  | C9 <sup>2</sup>  | C1   | C4               | 121.93(17) |
| O3                                | Tb1  | O2               | 77.34(5)   |  | O3               | C2   | Tb1 <sup>1</sup> | 73.34(10)  |
| O3                                | Tb1  | O4 <sup>1</sup>  | 75.84(5)   |  | O3               | C2   | O6               | 121.36(17) |
| O3                                | Tb1  | O5               | 146.03(5)  |  | O3               | C2   | C3               | 120.09(18) |
| O3                                | Tb1  | O6 <sup>1</sup>  | 122.28(5)  |  | O6               | C2   | Tb1 <sup>1</sup> | 48.94(9)   |
| O3                                | Tb1  | O7               | 131.17(5)  |  | O6               | C2   | C3               | 118.55(17) |
| O3                                | Tb1  | O8               | 88.77(5)   |  | C3               | C2   | Tb1 <sup>1</sup> | 163.65(14) |
| O3                                | Tb1  | O11              | 78.29(6)   |  | C5               | C3   | C2               | 119.03(17) |
| O3                                | Tb1  | C2 <sup>1</sup>  | 98.80(5)   |  | C5               | C3   | C6 <sup>3</sup>  | 119.84(17) |
| O3                                | Tb1  | C7               | 109.95(5)  |  | C6 <sup>3</sup>  | C3   | C2               | 121.13(17) |
| O4 <sup>1</sup>                   | Tb1  | O5               | 138.11(5)  |  | O2               | C4   | O4               | 124.76(18) |
| O4 <sup>1</sup>                   | Tb1  | O6 <sup>1</sup>  | 78.15(5)   |  | O2               | C4   | C1               | 118.14(17) |
| O4 <sup>1</sup>                   | Tb1  | O7               | 68.30(5)   |  | O4               | C4   | C1               | 117.10(17) |
| O4 <sup>1</sup>                   | Tb1  | O8               | 77.78(5)   |  | C6               | C5   | C3               | 121.10(18) |
| O4 <sup>1</sup>                   | Tb1  | O11              | 140.94(5)  |  | O12              | C6   | C3 <sup>3</sup>  | 123.29(17) |
| O4 <sup>1</sup>                   | Tb1  | C2 <sup>1</sup>  | 72.38(5)   |  | O12              | C6   | C5               | 117.65(18) |
| O4 <sup>1</sup>                   | Tb1  | C7               | 69.90(5)   |  | C5               | C6   | C3 <sup>3</sup>  | 119.06(18) |
| O5                                | Tb1  | O6 <sup>1</sup>  | 74.90(5)   |  | O7               | C7   | Tb1              | 64.84(10)  |
| O5                                | Tb1  | O7               | 76.54(5)   |  | O7               | C7   | C11              | 120.23(17) |
| O5                                | Tb1  | O8               | 98.67(5)   |  | O8               | C7   | Tb1              | 56.25(10)  |
| O5                                | Tb1  | O11              | 72.51(6)   |  | O8               | C7   | O7               | 120.90(17) |
| O5                                | Tb1  | C2 <sup>1</sup>  | 93.19(5)   |  | O8               | C7   | C11              | 118.87(17) |
| O5                                | Tb1  | C7               | 88.57(5)   |  | C11              | C7   | Tb1              | 173.24(14) |
| O6 <sup>1</sup>                   | Tb1  | O7               | 81.79(5)   |  | C9               | C8   | C1               | 121.81(18) |
| O6 <sup>1</sup>                   | Tb1  | O11              | 140.88(5)  |  | O9               | C9   | C1 <sup>2</sup>  | 123.48(18) |
| O6 <sup>1</sup>                   | Tb1  | C2 <sup>1</sup>  | 23.70(5)   |  | O9               | C9   | C8               | 117.72(18) |
| O6 <sup>1</sup>                   | Tb1  | C7               | 107.78(5)  |  | C8               | C9   | C1 <sup>2</sup>  | 118.80(18) |
| O7                                | Tb1  | C2 <sup>1</sup>  | 100.65(5)  |  | O5               | C10  | N1               | 124.5(2)   |
| O7                                | Tb1  | C7               | 26.51(5)   |  | C1A              | N3   | C2A              | 123.1(4)   |
| O8                                | Tb1  | O6 <sup>1</sup>  | 133.70(5)  |  | C1A              | N3   | C3A              | 119.4(4)   |
| O8                                | Tb1  | O7               | 52.61(5)   |  | C2A              | N3   | C3A              | 117.4(4)   |
| O8                                | Tb1  | O11              | 72.88(5)   |  | C1B              | N3   | C2B              | 118.6(8)   |
| O8                                | Tb1  | C2 <sup>1</sup>  | 146.22(5)  |  | C1B              | N3   | C3B              | 124.9(9)   |
| O8                                | Tb1  | C7               | 26.16(5)   |  | C3B              | N3   | C2B              | 116.0(9)   |
| O11                               | Tb1  | O7               | 110.52(5)  |  | C12              | C11  | C7               | 121.15(17) |
| O11                               | Tb1  | C2 <sup>1</sup>  | 140.87(5)  |  | C14              | C11  | C7               | 118.81(17) |
| O11                               | Tb1  | C7               | 92.51(6)   |  | C14              | C11  | C12              | 120.04(17) |
| C7                                | Tb1  | C2 <sup>1</sup>  | 124.09(5)  |  | O1A              | C12  | C11              | 124.08(18) |
| C4                                | O2   | Tb1              | 132.76(12) |  | O1A              | C12  | C14 <sup>4</sup> | 116.80(18) |
| C2                                | O3   | Tb1              | 171.24(13) |  | C14 <sup>4</sup> | C12  | C11              | 119.11(18) |
| C4                                | O4   | Tb1 <sup>1</sup> | 138.29(12) |  | O11              | C13  | N2               | 124.5(2)   |

|     |     |                  |            |  |                  |     |     |            |
|-----|-----|------------------|------------|--|------------------|-----|-----|------------|
| C10 | O5  | Tb1              | 123.76(14) |  | C11              | C14 | O1B | 132.7(6)   |
| C2  | O6  | Tb1 <sup>1</sup> | 107.36(12) |  | C12 <sup>4</sup> | C14 | O1B | 106.4(6)   |
| C7  | O7  | Tb1              | 88.65(11)  |  | C12 <sup>4</sup> | C14 | C11 | 120.85(18) |
| C7  | O8  | Tb1              | 97.59(12)  |  | O10              | C1A | N3  | 126.2(5)   |
| C13 | O11 | Tb1              | 134.70(15) |  | O10              | C1B | N3  | 125.6(9)   |
| C10 | N1  | C15              | 121.6(2)   |  |                  |     |     |            |

<sup>1</sup>-X,1-Y,1-Z; <sup>2</sup>-X,-Y,1-Z; <sup>3</sup>1-X,1-Y,1-Z; <sup>4</sup>1-X,2-Y,2-Z

| <b>Table S5: Atomic Occupancy for SION-2.</b> |                  |  |             |                  |  |             |                  |
|-----------------------------------------------|------------------|--|-------------|------------------|--|-------------|------------------|
| <b>Atom</b>                                   | <b>Occupancy</b> |  | <b>Atom</b> | <b>Occupancy</b> |  | <b>Atom</b> | <b>Occupancy</b> |
| O1A                                           | 0.890(5)         |  | H1A         | 0.890(5)         |  | O1B         | 0.110(5)         |
| H1B                                           | 0.110(5)         |  | H12A        | 0.110(5)         |  | H14         | 0.890(5)         |
| C1A                                           | 0.649(6)         |  | H1AA        | 0.649(6)         |  | C2A         | 0.649(6)         |
| H2AA                                          | 0.649(6)         |  | H2AB        | 0.649(6)         |  | H2AC        | 0.649(6)         |
| C3A                                           | 0.649(6)         |  | H3AA        | 0.649(6)         |  | H3AB        | 0.649(6)         |
| H3AC                                          | 0.649(6)         |  | C1B         | 0.351(6)         |  | H1BA        | 0.351(6)         |
| C2B                                           | 0.351(6)         |  | H2BA        | 0.351(6)         |  | H2BB        | 0.351(6)         |
| H2BC                                          | 0.351(6)         |  | C3B         | 0.351(6)         |  | H3BA        | 0.351(6)         |
| H3BB                                          | 0.351(6)         |  | H3BC        | 0.351(6)         |  |             |                  |

## S2.2 Crystal data for SION-1

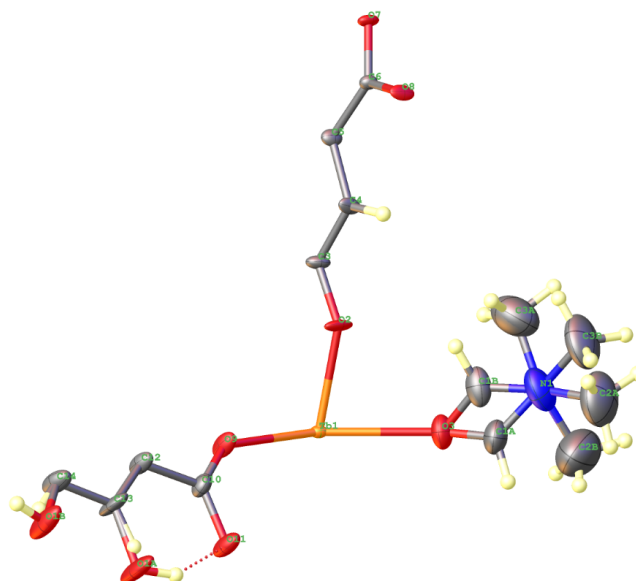

**Figure S3:** Asymmetric unit of the **SION-1** structure. The atomic displacement ellipsoids are set at a 50% probability level. Color scheme: Orange, Tb; red, O; grey, C; blue, N; yellow, H.

One red single crystal of **SION-1** was isolated from the reaction mixture, immobilized on a polymer loop, and mounted on a Bruker D8 Venture diffractometer equipped with a CMOS detector. Raw data treatment, structure solution, and refinement were performed using the same software as in case of **SION-2**.

Atomic positions were found from the difference–Fourier maps and refined anisotropically for all non-H atoms. H-atom positions were found and their  $x$ ,  $y$ ,  $z$ , and  $U_{iso}$  refined in the same way as in the structure of **SION-2**. Atoms: (C1A, C2A, C3A) and (C1B, C2B, C3B), together with the H-atoms bound to them, were refined as two components of a disorder in a similar way to the one used in the structure of **SION-2**. Same method was applied to independently refine the disorder over O1A and O1B atoms. On the atoms C1A, C2A, C3A, N1, belonging to the disordered DMF molecule, were imposed restraints for interatomic distances, planarity, and atomic displacement parameters. Same restraints were applied for C1B, C2B, C3B, N1 atoms.

| <b>Table S6: Crystal data and structure refinement for SION-1.</b> |                                                            |
|--------------------------------------------------------------------|------------------------------------------------------------|
| Identification code                                                | <b>SION -1</b>                                             |
| Empirical formula                                                  | $C_{11}H_{10}NO_7Tb$                                       |
| Formula weight                                                     | 427.12                                                     |
| Temperature/K                                                      | 293(2)                                                     |
| Crystal system                                                     | monoclinic                                                 |
| Space group                                                        | $P2_1/n$                                                   |
| $a/\text{\AA}$                                                     | 13.388(3)                                                  |
| $b/\text{\AA}$                                                     | 6.6366(12)                                                 |
| $c/\text{\AA}$                                                     | 15.567(2)                                                  |
| $\alpha/^\circ$                                                    | 90                                                         |
| $\beta/^\circ$                                                     | 98.599(14)                                                 |
| $\gamma/^\circ$                                                    | 90                                                         |
| Volume/ $\text{\AA}^3$                                             | 1367.6(4)                                                  |
| $Z$                                                                | 4                                                          |
| $\rho_{calc}/\text{g/cm}^3$                                        | 2.074                                                      |
| $\mu/\text{mm}^{-1}$                                               | 5.200                                                      |
| $F(000)$                                                           | 816.0                                                      |
| Crystal size/ $\text{mm}^3$                                        | $0.062 \times 0.059 \times 0.024$                          |
| Radiation                                                          | $\text{MoK}\alpha$ ( $\lambda = 0.71073$ )                 |
| $2\theta$ range for data collection/ $^\circ$                      | 5.294 to 61.078                                            |
| Index ranges                                                       | $-18 \leq h \leq 19, -9 \leq k \leq 9, -22 \leq l \leq 21$ |
| Reflections collected                                              | 15156                                                      |
| Independent reflections                                            | 4070 [ $R_{int} = 0.0666, R_{sigma} = 0.0711$ ]            |
| Data/restraints/parameters                                         | 4070/40/225                                                |
| Goodness-of-fit on $F^2$                                           | 1.055                                                      |
| Final $R$ indexes [ $I \geq 2\sigma(I)$ ]                          | $R_1 = 0.0369, wR_2 = 0.0495$                              |
| Final $R$ indexes [all data]                                       | $R_1 = 0.0681, wR_2 = 0.0552$                              |
| Largest diff. peak/hole / $e \text{\AA}^{-3}$                      | 0.91/-1.00                                                 |

**Table S7: Fractional Atomic Coordinates ( $\times 10^4$ ) and Equivalent Isotropic Displacement Parameters ( $\text{\AA}^2 \times 10^3$ ) for SION**

-1.  $U_{eq}$  is defined as 1/3 of the trace of the orthogonalised  $U_{ij}$  tensor.

| Atom | $x$       | $y$       | $z$        | $U_{eq}$ |
|------|-----------|-----------|------------|----------|
| Tb1  | 3313.4(2) | 5786.6(3) | 2875.2(2)  | 9.76(5)  |
| O7   | 7130(2)   | 10908(4)  | 6763.9(17) | 13.9(6)  |
| O8   | 6800(2)   | 7698(4)   | 6735.1(18) | 16.5(7)  |
| O9   | 1919(2)   | 5440(4)   | 3591(2)    | 25.1(8)  |
| O2   | 4346(2)   | 6658(4)   | 4018(2)    | 23.7(8)  |
| O11  | 1029(3)   | 2666(5)   | 3188(2)    | 31.0(8)  |
| O3   | 4814(3)   | 4197(5)   | 2546(2)    | 35.2(8)  |
| C6   | 6587(3)   | 9429(6)   | 6425(2)    | 11.0(8)  |
| C4   | 5407(3)   | 8102(5)   | 5198(3)    | 16.3(9)  |
| C5   | 5772(3)   | 9765(6)   | 5706(3)    | 14.3(9)  |
| C10  | 1231(3)   | 4214(7)   | 3667(3)    | 21.5(9)  |
| C3   | 4640(3)   | 8286(6)   | 4484(3)    | 16.0(9)  |
| C12  | 592(4)    | 4583(6)   | 4355(3)    | 22.7(11) |

|     |           |          |          |          |
|-----|-----------|----------|----------|----------|
| O1A | -445(4)   | 1572(7)  | 4010(3)  | 47.9(16) |
| O1B | -1333(19) | 2030(30) | 5311(17) | 52(8)    |
| C14 | -757(4)   | 3673(7)  | 5147(3)  | 30.6(12) |
| C13 | -176(4)   | 3255(7)  | 4504(3)  | 32.4(13) |
| N1  | 6245(4)   | 2571(9)  | 3116(4)  | 62.7(16) |
| C1B | 5554(8)   | 3786(16) | 3138(8)  | 42(3)    |
| C3B | 7057(10)  | 1960(20) | 3789(10) | 91(5)    |
| C2B | 6243(13)  | 1450(20) | 2281(10) | 136(8)   |
| C1A | 5361(12)  | 2790(20) | 2633(11) | 44(4)    |
| C3A | 6552(15)  | 4310(30) | 3730(12) | 91(7)    |
| C2A | 6791(17)  | 700(30)  | 3289(16) | 97(8)    |

**Table S8: Bond Lengths for SION-1.**

| Atom | Atom             | Length/Å  |  | Atom | Atom             | Length/Å  |
|------|------------------|-----------|--|------|------------------|-----------|
| Tb1  | O7 <sup>1</sup>  | 2.362(3)  |  | O3   | C1A              | 1.180(14) |
| Tb1  | O7 <sup>2</sup>  | 2.439(3)  |  | C6   | Tb1 <sup>5</sup> | 2.983(4)  |
| Tb1  | O8 <sup>3</sup>  | 2.401(3)  |  | C6   | C5               | 1.460(5)  |
| Tb1  | O8 <sup>2</sup>  | 2.682(3)  |  | C4   | C5               | 1.401(5)  |
| Tb1  | O9               | 2.324(3)  |  | C4   | C3               | 1.401(6)  |
| Tb1  | O2               | 2.162(3)  |  | C5   | C3 <sup>1</sup>  | 1.420(5)  |
| Tb1  | O11 <sup>4</sup> | 2.346(3)  |  | C10  | C12              | 1.487(6)  |
| Tb1  | O3               | 2.391(3)  |  | C3   | C5 <sup>1</sup>  | 1.420(5)  |
| Tb1  | C6 <sup>2</sup>  | 2.983(4)  |  | C12  | C14 <sup>7</sup> | 1.392(6)  |
| O7   | Tb1 <sup>5</sup> | 2.439(3)  |  | C12  | C13              | 1.400(6)  |
| O7   | Tb1 <sup>1</sup> | 2.362(3)  |  | O1A  | C13              | 1.374(5)  |
| O7   | C6               | 1.287(4)  |  | O1B  | C14              | 1.38(2)   |
| O8   | Tb1 <sup>3</sup> | 2.401(3)  |  | C14  | C12 <sup>7</sup> | 1.392(6)  |
| O8   | Tb1 <sup>5</sup> | 2.682(3)  |  | C14  | C13              | 1.384(6)  |
| O8   | C6               | 1.262(4)  |  | N1   | C1B              | 1.231(11) |
| O9   | C10              | 1.248(5)  |  | N1   | C3B              | 1.451(12) |
| O2   | C3               | 1.328(4)  |  | N1   | C2B              | 1.498(13) |
| O11  | Tb1 <sup>6</sup> | 2.346(3)  |  | N1   | C1A              | 1.312(17) |
| O11  | C10              | 1.275(5)  |  | N1   | C3A              | 1.516(16) |
| O3   | C1B              | 1.278(11) |  | N1   | C2A              | 1.444(16) |

<sup>1</sup>1-X,2-Y,1-Z; <sup>2</sup>-1/2+X,3/2-Y,-1/2+Z; <sup>3</sup>1-X,1-Y,1-Z; <sup>4</sup>1/2-X,1/2+Y,1/2-Z; <sup>5</sup>1/2+X,3/2-Y,1/2+Z;

<sup>6</sup>1/2-X,-1/2+Y,1/2-Z; <sup>7</sup>-X,1-Y,1-Z

**Table S9: Bond Angles for SION-1.**

| Atom            | Atom | Atom            | Angle/°    |  | Atom | Atom | Atom             | Angle/°  |
|-----------------|------|-----------------|------------|--|------|------|------------------|----------|
| O7 <sup>1</sup> | Tb1  | O7 <sup>2</sup> | 115.93(6)  |  | C6   | O8   | Tb1 <sup>5</sup> | 90.9(2)  |
| O7 <sup>1</sup> | Tb1  | O8 <sup>2</sup> | 67.49(8)   |  | C6   | O8   | Tb1 <sup>3</sup> | 162.6(3) |
| O7 <sup>1</sup> | Tb1  | O8 <sup>3</sup> | 143.76(10) |  | C10  | O9   | Tb1              | 140.1(3) |
| O7 <sup>2</sup> | Tb1  | O8 <sup>2</sup> | 50.00(8)   |  | C3   | O2   | Tb1              | 140.2(3) |
| O7 <sup>1</sup> | Tb1  | O3              | 135.22(11) |  | C10  | O11  | Tb1 <sup>6</sup> | 140.5(3) |
| O7 <sup>1</sup> | Tb1  | C6 <sup>2</sup> | 91.75(9)   |  | C1B  | O3   | Tb1              | 121.7(6) |

|                  |     |                  |            |  |                  |     |                  |           |
|------------------|-----|------------------|------------|--|------------------|-----|------------------|-----------|
| O7 <sup>2</sup>  | Tb1 | C6 <sup>2</sup>  | 24.97(9)   |  | C1A              | O3  | Tb1              | 148.3(8)  |
| O8 <sup>3</sup>  | Tb1 | O7 <sup>2</sup>  | 71.11(9)   |  | O7               | C6  | Tb1 <sup>5</sup> | 53.15(19) |
| O8 <sup>3</sup>  | Tb1 | O8 <sup>2</sup>  | 117.28(7)  |  | O7               | C6  | C5               | 120.6(3)  |
| O8 <sup>3</sup>  | Tb1 | C6 <sup>2</sup>  | 94.24(9)   |  | O8               | C6  | Tb1 <sup>5</sup> | 64.0(2)   |
| O8 <sup>2</sup>  | Tb1 | C6 <sup>2</sup>  | 25.02(9)   |  | O8               | C6  | O7               | 117.2(3)  |
| O9               | Tb1 | O7 <sup>2</sup>  | 79.11(10)  |  | O8               | C6  | C5               | 122.2(3)  |
| O9               | Tb1 | O7 <sup>1</sup>  | 74.30(10)  |  | C5               | C6  | Tb1 <sup>5</sup> | 173.7(3)  |
| O9               | Tb1 | O8 <sup>3</sup>  | 72.43(10)  |  | C3               | C4  | C5               | 122.1(4)  |
| O9               | Tb1 | O8 <sup>2</sup>  | 76.85(11)  |  | C4               | C5  | C6               | 118.0(3)  |
| O9               | Tb1 | O11 <sup>4</sup> | 143.48(11) |  | C4               | C5  | C3 <sup>1</sup>  | 120.6(4)  |
| O9               | Tb1 | O3               | 145.05(11) |  | C3 <sup>1</sup>  | C5  | C6               | 121.4(3)  |
| O9               | Tb1 | C6 <sup>2</sup>  | 76.74(11)  |  | O9               | C10 | O11              | 124.4(4)  |
| O2               | Tb1 | O7 <sup>1</sup>  | 73.04(9)   |  | O9               | C10 | C12              | 118.3(4)  |
| O2               | Tb1 | O7 <sup>2</sup>  | 167.05(10) |  | O11              | C10 | C12              | 117.4(4)  |
| O2               | Tb1 | O8 <sup>2</sup>  | 140.45(9)  |  | O2               | C3  | C4               | 119.0(4)  |
| O2               | Tb1 | O8 <sup>3</sup>  | 96.11(9)   |  | O2               | C3  | C5 <sup>1</sup>  | 123.6(4)  |
| O2               | Tb1 | O9               | 95.33(12)  |  | C4               | C3  | C5 <sup>1</sup>  | 117.4(3)  |
| O2               | Tb1 | O11 <sup>4</sup> | 100.20(13) |  | C14 <sup>7</sup> | C12 | C10              | 118.5(4)  |
| O2               | Tb1 | O3               | 80.79(12)  |  | C14 <sup>7</sup> | C12 | C13              | 119.3(4)  |
| O2               | Tb1 | C6 <sup>2</sup>  | 164.40(10) |  | C13              | C12 | C10              | 122.1(4)  |
| O11 <sup>4</sup> | Tb1 | O7 <sup>2</sup>  | 90.98(11)  |  | O1B              | C14 | C12 <sup>7</sup> | 126.8(10) |
| O11 <sup>4</sup> | Tb1 | O7 <sup>1</sup>  | 78.96(10)  |  | O1B              | C14 | C13              | 111.4(9)  |
| O11 <sup>4</sup> | Tb1 | O8 <sup>2</sup>  | 70.12(11)  |  | C13              | C14 | C12 <sup>7</sup> | 120.6(4)  |
| O11 <sup>4</sup> | Tb1 | O8 <sup>3</sup>  | 137.27(11) |  | O1A              | C13 | C12              | 123.8(4)  |
| O11 <sup>4</sup> | Tb1 | O3               | 70.60(11)  |  | O1A              | C13 | C14              | 116.0(4)  |
| O11 <sup>4</sup> | Tb1 | C6 <sup>2</sup>  | 79.73(12)  |  | C14              | C13 | C12              | 120.0(4)  |
| O3               | Tb1 | O7 <sup>2</sup>  | 97.01(11)  |  | C1B              | N1  | C3B              | 130.3(11) |
| O3               | Tb1 | O8 <sup>2</sup>  | 126.85(11) |  | C1B              | N1  | C2B              | 116.5(10) |
| O3               | Tb1 | O8 <sup>3</sup>  | 73.49(11)  |  | C3B              | N1  | C2B              | 113.1(10) |
| O3               | Tb1 | C6 <sup>2</sup>  | 113.43(11) |  | C1A              | N1  | C3A              | 114.3(11) |
| Tb1 <sup>1</sup> | O7  | Tb1 <sup>5</sup> | 114.79(10) |  | C1A              | N1  | C2A              | 126.3(14) |
| C6               | O7  | Tb1 <sup>5</sup> | 101.9(2)   |  | C2A              | N1  | C3A              | 117.0(13) |
| C6               | O7  | Tb1 <sup>1</sup> | 131.2(2)   |  | N1               | C1B | O3               | 128.6(12) |
| Tb1 <sup>3</sup> | O8  | Tb1 <sup>5</sup> | 105.30(9)  |  | O3               | C1A | N1               | 130.2(16) |

<sup>1</sup>1-X,2-Y,1-Z; <sup>2</sup>-1/2+X,3/2-Y,-1/2+Z; <sup>3</sup>1-X,1-Y,1-Z; <sup>4</sup>1/2-X,1/2+Y,1/2-Z; <sup>5</sup>1/2+X,3/2-Y,1/2+Z;

<sup>6</sup>1/2-X,-1/2+Y,1/2-Z; <sup>7</sup>-X,1-Y,1-Z

| Table S10: Atomic Occupancy for SION-1. |           |      |           |      |           |
|-----------------------------------------|-----------|------|-----------|------|-----------|
| Atom                                    | Occupancy | Atom | Occupancy | Atom | Occupancy |
| O1A                                     | 0.830(7)  | H1A  | 0.830(7)  | O1B  | 0.170(7)  |
| H1B                                     | 0.170(7)  | H14  | 0.830(7)  | H13  | 0.170(7)  |
| C1B                                     | 0.589(11) | H1BA | 0.589(11) | C3B  | 0.589(11) |
| H3BA                                    | 0.589(11) | H3BB | 0.589(11) | H3BC | 0.589(11) |
| C2B                                     | 0.589(11) | H2BA | 0.589(11) | H2BB | 0.589(11) |
| H2BC                                    | 0.589(11) | C1A  | 0.411(11) | H1AA | 0.411(11) |
| C3A                                     | 0.411(11) | H3AA | 0.411(11) | H3AB | 0.411(11) |
| H3AC                                    | 0.411(11) | C2A  | 0.411(11) | H2AA | 0.411(11) |

*Anderson et al.*

|      |           |  |      |           |  |  |
|------|-----------|--|------|-----------|--|--|
| H2AB | 0.411(11) |  | H2AC | 0.411(11) |  |  |
|------|-----------|--|------|-----------|--|--|



### S2.3 Crystal data for SION-2@H<sub>2</sub>O

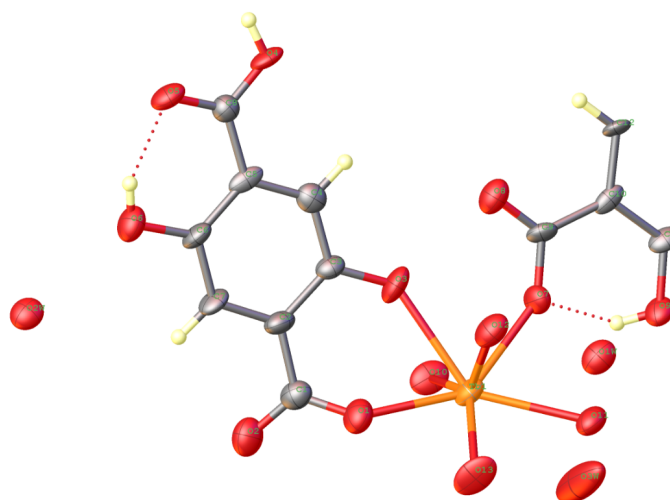

**Figure S4:** Asymmetric unit of the **SION-2@H<sub>2</sub>O** structure. The atomic displacement ellipsoids are set at a 50% probability level. Color scheme: Orange, Tb; red, O; grey, C; blue, N; yellow, H.

Single crystals of **SION-2@H<sub>2</sub>O** were isolated from the reaction vessel. A suitable crystal was selected and mounted onto the diffractometer at the BM01 Beamline of the European Synchrotron Radiation Facility. The crystal was kept at 100.0 K during data collection. Using Olex2,<sup>3</sup> the structure was solved with the ShelXT<sup>4</sup> structure solution program using Intrinsic Phasing and refined with the ShelXT<sup>4</sup> refinement package using Least Squares minimization. Atomic positions were found from the difference–Fourier maps and refined anisotropically for all non-H atoms. Positions of aromatic and amide H-atoms were refined using a riding model, while H-atoms in methyl and hydroxy groups were refined as in idealized rotating groups.  $U_{iso}$  for H-atoms were set to 1.2 times  $U_{eq}$  of neighboring atoms, and 1.5 times  $U_{eq}$  of atoms in terminating groups. O-atoms belonging to coordinated (O10, O11, O12, O13) as well as free water solvent molecules (O1W, O2W, O3W) have been found from the difference–Fourier maps, however H-atoms attached to them were not localized due to the lack of chemical information or distinctive electron density maxima.

| <b>Table S11: Crystal data and structure refinement for SION-2@H<sub>2</sub>O.</b> |                                                                              |
|------------------------------------------------------------------------------------|------------------------------------------------------------------------------|
| Identification code                                                                | <b>SION-2@H<sub>2</sub>O</b>                                                 |
| Empirical formula                                                                  | C <sub>12</sub> H <sub>12</sub> O <sub>16</sub> Tb                           |
| Formula weight                                                                     | 571.14                                                                       |
| Temperature/K                                                                      | 100.0                                                                        |
| Crystal system                                                                     | triclinic                                                                    |
| Space group                                                                        | <i>P</i> -1                                                                  |
| <i>a</i> /Å                                                                        | 9.5715(9)                                                                    |
| <i>b</i> /Å                                                                        | 10.1208(10)                                                                  |
| <i>c</i> /Å                                                                        | 11.6980(13)                                                                  |
| $\alpha$ /°                                                                        | 113.409(10)                                                                  |
| $\beta$ /°                                                                         | 101.145(9)                                                                   |
| $\gamma$ /°                                                                        | 105.464(8)                                                                   |
| Volume/Å <sup>3</sup>                                                              | 943.19(18)                                                                   |
| <i>Z</i>                                                                           | 2                                                                            |
| $\rho_{calc}$ /cm <sup>3</sup>                                                     | 2.011                                                                        |
| $\mu$ /mm <sup>-1</sup>                                                            | 3.885                                                                        |
| <i>F</i> (000)                                                                     | 554.0                                                                        |
| Crystal size/mm <sup>3</sup>                                                       | 0.565 × 0.173 × 0.071                                                        |
| Radiation                                                                          | synchrotron ( $\lambda = 0.7153$ )                                           |
| 2 $\theta$ range for data collection/°                                             | 4.058 to 51.322                                                              |
| Index ranges                                                                       | -10 ≤ <i>h</i> ≤ 11, -12 ≤ <i>k</i> ≤ 11, -13 ≤ <i>l</i> ≤ 8                 |
| Reflections collected                                                              | 6544                                                                         |
| Independent reflections                                                            | 2780 [ <i>R</i> <sub>int</sub> = 0.0645, <i>R</i> <sub>sigma</sub> = 0.0890] |
| Data/restraints/parameters                                                         | 2780/42/264                                                                  |
| Goodness-of-fit on <i>F</i> <sup>2</sup>                                           | 1.063                                                                        |
| Final <i>R</i> indexes [ <i>I</i> ≥ 2 $\sigma$ ( <i>I</i> )]                       | <i>R</i> <sub>1</sub> = 0.0770, <i>wR</i> <sub>2</sub> = 0.1941              |
| Final <i>R</i> indexes [all data]                                                  | <i>R</i> <sub>1</sub> = 0.1008, <i>wR</i> <sub>2</sub> = 0.2210              |
| Largest diff. peak/hole / e Å <sup>-3</sup>                                        | 1.82/-4.96                                                                   |

| <b>Table S12: Fractional Atomic Coordinates (×10<sup>4</sup>) and Equivalent Isotropic Displacement Parameters (Å<sup>2</sup>×10<sup>3</sup>) for SION-2@H<sub>2</sub>O. <i>U</i><sub>eq</sub> is defined as 1/3 of the trace of the orthogonalised <i>U</i><sub>ij</sub> tensor.</b> |           |           |           |              |
|---------------------------------------------------------------------------------------------------------------------------------------------------------------------------------------------------------------------------------------------------------------------------------------|-----------|-----------|-----------|--------------|
| <b>Atom</b>                                                                                                                                                                                                                                                                           | <b>x</b>  | <b>y</b>  | <b>z</b>  | <b>U(eq)</b> |
| Tb1                                                                                                                                                                                                                                                                                   | 6380.4(8) | 5891.8(8) | 8688.4(8) | 31.4(4)      |
| O1                                                                                                                                                                                                                                                                                    | 4082(12)  | 5066(14)  | 8896(13)  | 43(3)        |
| O2                                                                                                                                                                                                                                                                                    | 2245(13)  | 3443(13)  | 9129(13)  | 47(3)        |
| O3                                                                                                                                                                                                                                                                                    | 4407(11)  | 3784(12)  | 6543(12)  | 41(3)        |
| O4                                                                                                                                                                                                                                                                                    | 280(12)   | 490(11)   | 1973(11)  | 32(3)        |
| O5                                                                                                                                                                                                                                                                                    | -1894(12) | 267(12)   | 2429(11)  | 36(3)        |
| O6                                                                                                                                                                                                                                                                                    | -1920(12) | 1016(14)  | 4763(13)  | 42(3)        |
| O7                                                                                                                                                                                                                                                                                    | 7689(11)  | 5130(12)  | 7160(11)  | 35(3)        |
| O8                                                                                                                                                                                                                                                                                    | 6070(12)  | 3893(12)  | 5096(13)  | 40(3)        |
| O9                                                                                                                                                                                                                                                                                    | 10591(12) | 6148(13)  | 7687(12)  | 36(3)        |
| O10                                                                                                                                                                                                                                                                                   | 6567(14)  | 3532(12)  | 8548(13)  | 41(3)        |
| O11                                                                                                                                                                                                                                                                                   | 8821(12)  | 7976(13)  | 9431(12)  | 39(3)        |
| O12                                                                                                                                                                                                                                                                                   | 5604(12)  | 7025(13)  | 7399(13)  | 42(3)        |
| O13                                                                                                                                                                                                                                                                                   | 6069(14)  | 8218(12)  | 10103(14) | 51(3)        |

|     |           |           |           |        |
|-----|-----------|-----------|-----------|--------|
| C1  | 2838(18)  | 3896(18)  | 8402(18)  | 35(4)  |
| C2  | 2049(18)  | 3084(17)  | 6992(16)  | 33(4)  |
| C3  | 2850(17)  | 3046(16)  | 6062(16)  | 26(3)  |
| C4  | 2019(18)  | 2259(17)  | 4704(17)  | 32(4)  |
| C5  | 437(17)   | 1538(15)  | 4206(16)  | 29(4)  |
| C6  | -341(17)  | 1621(17)  | 5146(17)  | 31(4)  |
| C7  | 448(17)   | 2327(17)  | 6446(17)  | 32(4)  |
| C8  | -432(17)  | 719(17)   | 2808(17)  | 29(3)  |
| C9  | 7395(17)  | 4580(16)  | 5901(15)  | 27(4)  |
| C10 | 8758(16)  | 4771(15)  | 5441(16)  | 27(4)  |
| C11 | 10272(17) | 5560(16)  | 6341(16)  | 28(3)  |
| C12 | 8501(16)  | 4220(15)  | 4103(14)  | 24(3)  |
| O3W | 6818(16)  | 11880(20) | 10150(18) | 119(9) |
| O1W | 7078(13)  | 9960(13)  | 7942(12)  | 41(3)  |
| O2W | -3804(12) | 1020(13)  | 6207(12)  | 40(3)  |

**Table S13: Bond Lengths for SION-2@H<sub>2</sub>O.**

| Atom | Atom             | Length/Å  | Atom | Atom             | Length/Å  |
|------|------------------|-----------|------|------------------|-----------|
| Tb1  | O1               | 2.232(11) | O8   | C9               | 1.236(18) |
| Tb1  | O2 <sup>1</sup>  | 2.359(14) | O9   | C11              | 1.378(19) |
| Tb1  | O3               | 2.486(11) | C1   | C2               | 1.44(2)   |
| Tb1  | O7               | 2.375(10) | C2   | C3               | 1.44(2)   |
| Tb1  | O10              | 2.385(10) | C2   | C7               | 1.40(2)   |
| Tb1  | O11              | 2.407(10) | C3   | C4               | 1.40(2)   |
| Tb1  | O12              | 2.353(13) | C4   | C5               | 1.38(2)   |
| Tb1  | O13              | 2.417(10) | C5   | C6               | 1.43(2)   |
| O1   | C1               | 1.262(19) | C5   | C8               | 1.44(2)   |
| O2   | Tb1 <sup>1</sup> | 2.359(13) | C6   | C7               | 1.34(2)   |
| O2   | C1               | 1.27(2)   | C9   | C10              | 1.50(2)   |
| O3   | C3               | 1.358(17) | C10  | C11              | 1.40(2)   |
| O4   | C8               | 1.278(18) | C10  | C12              | 1.38(2)   |
| O5   | C8               | 1.274(18) | C11  | C12 <sup>2</sup> | 1.37(2)   |
| O6   | C6               | 1.373(18) | C12  | C11 <sup>2</sup> | 1.37(2)   |
| O7   | C9               | 1.290(18) |      |                  |           |

<sup>1</sup>1-X,1-Y,2-Z; <sup>2</sup>2-X,1-Y,1-Z

**Table S14: Bond Angles for SION-2@H<sub>2</sub>O.**

| Atom            | Atom | Atom            | Angle/°  | Atom | Atom | Atom | Angle/°   |
|-----------------|------|-----------------|----------|------|------|------|-----------|
| O1              | Tb1  | O2 <sup>1</sup> | 93.7(4)  | C9   | O7   | Tb1  | 137.3(9)  |
| O1              | Tb1  | O3              | 68.3(4)  | O1   | C1   | O2   | 121.1(16) |
| O1              | Tb1  | O7              | 139.9(4) | O1   | C1   | C2   | 119.6(15) |
| O1              | Tb1  | O10             | 86.8(4)  | O2   | C1   | C2   | 119.2(14) |
| O1              | Tb1  | O11             | 148.6(4) | C1   | C2   | C3   | 122.4(14) |
| O1              | Tb1  | O12             | 94.4(4)  | C7   | C2   | C1   | 121.8(15) |
| O1              | Tb1  | O13             | 74.5(4)  | C7   | C2   | C3   | 115.8(15) |
| O2 <sup>1</sup> | Tb1  | O3              | 145.5(4) | O3   | C3   | C2   | 118.2(14) |
| O2 <sup>1</sup> | Tb1  | O7              | 114.1(4) | O3   | C3   | C4   | 121.9(14) |
| O2 <sup>1</sup> | Tb1  | O10             | 75.2(4)  | C4   | C3   | C2   | 119.8(14) |

|                 |     |                  |           |  |                  |     |     |           |
|-----------------|-----|------------------|-----------|--|------------------|-----|-----|-----------|
| O2 <sup>1</sup> | Tb1 | O11              | 71.5(4)   |  | C5               | C4  | C3  | 122.5(15) |
| O2 <sup>1</sup> | Tb1 | O13              | 74.3(4)   |  | C4               | C5  | C6  | 116.9(15) |
| O7              | Tb1 | O3               | 72.7(4)   |  | C4               | C5  | C8  | 123.0(15) |
| O7              | Tb1 | O10              | 74.2(4)   |  | C6               | C5  | C8  | 120.1(13) |
| O7              | Tb1 | O11              | 70.8(4)   |  | O6               | C6  | C5  | 121.7(15) |
| O7              | Tb1 | O13              | 138.8(4)  |  | C7               | C6  | O6  | 117.2(15) |
| O10             | Tb1 | O3               | 74.6(4)   |  | C7               | C6  | C5  | 121.1(14) |
| O10             | Tb1 | O11              | 114.4(4)  |  | C6               | C7  | C2  | 123.9(16) |
| O10             | Tb1 | O13              | 142.8(5)  |  | O4               | C8  | C5  | 119.5(13) |
| O11             | Tb1 | O3               | 137.5(4)  |  | O5               | C8  | O4  | 121.2(15) |
| O11             | Tb1 | O13              | 74.9(4)   |  | O5               | C8  | C5  | 119.3(14) |
| O12             | Tb1 | O2 <sup>1</sup>  | 141.3(4)  |  | O7               | C9  | C10 | 116.5(13) |
| O12             | Tb1 | O3               | 71.6(4)   |  | O8               | C9  | O7  | 122.8(14) |
| O12             | Tb1 | O7               | 81.7(4)   |  | O8               | C9  | C10 | 120.7(14) |
| O12             | Tb1 | O10              | 142.9(4)  |  | C11              | C10 | C9  | 121.5(15) |
| O12             | Tb1 | O11              | 82.4(4)   |  | C12              | C10 | C9  | 118.6(13) |
| O12             | Tb1 | O13              | 71.6(4)   |  | C12              | C10 | C11 | 119.8(14) |
| O13             | Tb1 | O3               | 124.3(4)  |  | O9               | C11 | C10 | 122.2(14) |
| C1              | O1  | Tb1              | 142.7(11) |  | C12 <sup>2</sup> | C11 | O9  | 117.5(13) |
| C1              | O2  | Tb1 <sup>1</sup> | 124.1(11) |  | C12 <sup>2</sup> | C11 | C10 | 120.3(15) |
| C3              | O3  | Tb1              | 136.5(10) |  | C11 <sup>2</sup> | C12 | C10 | 119.8(14) |

<sup>1</sup>1-X,1-Y,2-Z; <sup>2</sup>2-X,1-Y,1-Z

## S2.4 Crystal data for SION-1@H<sub>2</sub>O

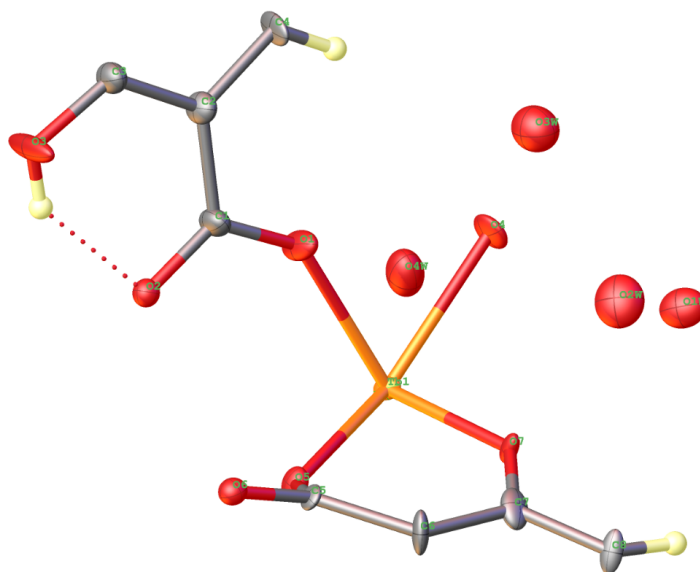

**Figure S5:** Asymmetric unit of the **SION-1@H<sub>2</sub>O** structure. The atomic displacement ellipsoids are set at a 50% probability level. Color scheme: Orange, Tb; red, O; grey, C; blue, N; yellow, H.

Single crystals of **SION-1@H<sub>2</sub>O** were isolated from the reaction vessel. A suitable crystal was selected and mounted onto the 3-circle diffractometer at the 11.3.1 beamline of the Advance Light Source synchrotron facility. Only one out of many attempts to probe this compound with X-rays turned out to be successful. The crystal, however, was characterized by strong mosaicity and gave broad reflections. The crystal was kept at 100(2) K during data collection. Using Olex2,<sup>3</sup> the structure was solved with the ShelXT<sup>4</sup> structure solution program using Intrinsic Phasing and refined with the ShelXL<sup>4</sup> refinement package using Least Squares minimization.

Atomic positions were found from the difference–Fourier maps and refined anisotropically for all non-H atoms. H-atoms were refined as a riding model. O-atoms belonging to coordinated (O4) as well as free water solvent molecules (O1W, O2W, O3W, O4W) have been found from the difference–Fourier maps, however H-atoms attached to them were not localized due to the lack of chemical information or distinctive electron density maxima. Upon the final refinement some significant electron density maxima have been recognized, most of them about Tb-atom, but no atoms are expected in their positions. Several electron density peaks and holes in the proximity of

the Tb-atom can be explained as artifact (finite Fourier sum truncation), whereas those in the channels are probably coming from unresolved disorder of free solvent molecules unaccounted for by the model.

| <b>Table S15:</b> Crystal data and structure refinement for <b>SION-1@H<sub>2</sub>O</b> . |                                                                              |
|--------------------------------------------------------------------------------------------|------------------------------------------------------------------------------|
| Identification code                                                                        | <b>SION-1@H<sub>2</sub>O</b>                                                 |
| Empirical formula                                                                          | C <sub>8</sub> H <sub>11</sub> O <sub>11</sub> Tb                            |
| Formula weight                                                                             | 442.08                                                                       |
| Temperature/K                                                                              | 100(2)                                                                       |
| Crystal system                                                                             | monoclinic                                                                   |
| Space group                                                                                | <i>P</i> 2 <sub>1</sub> / <i>n</i>                                           |
| <i>a</i> /Å                                                                                | 12.3720(10)                                                                  |
| <i>b</i> /Å                                                                                | 6.5373(4)                                                                    |
| <i>c</i> /Å                                                                                | 16.4809(12)                                                                  |
| $\alpha$ /°                                                                                | 90                                                                           |
| $\beta$ /°                                                                                 | 99.121(5)                                                                    |
| $\gamma$ /°                                                                                | 90                                                                           |
| Volume/Å <sup>3</sup>                                                                      | 1316.11(17)                                                                  |
| <i>Z</i>                                                                                   | 4                                                                            |
| $\rho_{\text{calc}}$ /g/cm <sup>3</sup>                                                    | 2.231                                                                        |
| $\mu$ /mm <sup>-1</sup>                                                                    | 6.762                                                                        |
| <i>F</i> (000)                                                                             | 848.0                                                                        |
| Crystal size/mm <sup>3</sup>                                                               | 0.02 × 0.015 × 0.01                                                          |
| Radiation                                                                                  | synchrotron ( $\lambda = 0.7749$ )                                           |
| 2 $\theta$ range for data collection/°                                                     | 4.88 to 57.922                                                               |
| Index ranges                                                                               | -15 ≤ <i>h</i> ≤ 15, -8 ≤ <i>k</i> ≤ 8, -20 ≤ <i>l</i> ≤ 20                  |
| Reflections collected                                                                      | 15766                                                                        |
| Independent reflections                                                                    | 2673 [ <i>R</i> <sub>int</sub> = 0.0874, <i>R</i> <sub>sigma</sub> = 0.0605] |
| Data/restraints/parameters                                                                 | 2673/36/182                                                                  |
| Goodness-of-fit on <i>F</i> <sup>2</sup>                                                   | 1.166                                                                        |
| Final <i>R</i> indexes [ <i>I</i> ≥ 2 $\sigma$ ( <i>I</i> )]                               | <i>R</i> <sub>1</sub> = 0.1081, <i>wR</i> <sub>2</sub> = 0.2569              |
| Final <i>R</i> indexes [all data]                                                          | <i>R</i> <sub>1</sub> = 0.1247, <i>wR</i> <sub>2</sub> = 0.2649              |
| Largest diff. peak/hole / e Å <sup>-3</sup>                                                | 8.27/-10.67                                                                  |

| <b>Table S16:</b> Fractional Atomic Coordinates (×10 <sup>4</sup> ) and Equivalent Isotropic Displacement Parameters (Å <sup>2</sup> ×10 <sup>3</sup> ) for <b>SION-1@H<sub>2</sub>O</b> . <i>U</i> <sub>eq</sub> is defined as 1/3 of the trace of the orthogonalised <i>U</i> <sub>ij</sub> tensor. |           |           |           |              |
|-------------------------------------------------------------------------------------------------------------------------------------------------------------------------------------------------------------------------------------------------------------------------------------------------------|-----------|-----------|-----------|--------------|
| Atom                                                                                                                                                                                                                                                                                                  | <i>x</i>  | <i>y</i>  | <i>z</i>  | <b>U(eq)</b> |
| Tb1                                                                                                                                                                                                                                                                                                   | 6573.4(9) | 820.6(17) | 2173.3(6) | 9.6(3)       |
| O1                                                                                                                                                                                                                                                                                                    | 6056(17)  | 2630(30)  | 3262(11)  | 27(4)        |
| O2                                                                                                                                                                                                                                                                                                    | 6991(13)  | 5540(30)  | 3556(9)   | 13(3)        |
| O3                                                                                                                                                                                                                                                                                                    | 6600(20)  | 7800(30)  | 4763(14)  | 43(6)        |
| O4                                                                                                                                                                                                                                                                                                    | 5172(15)  | -1020(30) | 2656(11)  | 23(4)        |
| O5                                                                                                                                                                                                                                                                                                    | 7068(13)  | 4050(30)  | 1823(9)   | 15(3)        |
| O6                                                                                                                                                                                                                                                                                                    | 6747(13)  | 7270(30)  | 1795(9)   | 14(3)        |
| O7                                                                                                                                                                                                                                                                                                    | 5410(14)  | 1710(20)  | 1069(9)   | 13(3)        |
| C1                                                                                                                                                                                                                                                                                                    | 6270(20)  | 4280(40)  | 3693(14)  | 19(5)        |
| C2                                                                                                                                                                                                                                                                                                    | 5620(20)  | 4650(40)  | 4366(15)  | 17(5)        |
| C3                                                                                                                                                                                                                                                                                                    | 5810(20)  | 6400(40)  | 4850(15)  | 19(5)        |

|     |          |          |          |       |
|-----|----------|----------|----------|-------|
| C4  | 4830(20) | 3290(40) | 4536(16) | 20(5) |
| C5  | 6492(17) | 5640(40) | 1495(12) | 10(4) |
| C6  | 5710(20) | 5260(40) | 731(16)  | 18(5) |
| C7  | 5240(20) | 3260(40) | 546(17)  | 20(5) |
| C8  | 4560(20) | 3080(40) | -215(15) | 16(5) |
| O3W | 3383(19) | 1350(30) | 2732(14) | 37(5) |
| O4W | 4339(18) | 5260(30) | 2256(13) | 35(5) |
| O1W | 3233(17) | 410(30)  | 1014(12) | 29(5) |
| O2W | 2546(18) | 4580(30) | 974(14)  | 37(5) |

**Table S17: Bond Lengths for SION-1@H<sub>2</sub>O.**

| Atom | Atom             | Length/Å  | Atom | Atom             | Length/Å  |
|------|------------------|-----------|------|------------------|-----------|
| Tb1  | O1               | 2.321(17) | O6   | Tb1 <sup>3</sup> | 2.645(16) |
| Tb1  | O2 <sup>1</sup>  | 2.304(15) | O6   | Tb1 <sup>4</sup> | 2.420(17) |
| Tb1  | O4               | 2.350(17) | O6   | C5               | 1.20(3)   |
| Tb1  | O5 <sup>1</sup>  | 2.455(16) | O7   | C7               | 1.33(3)   |
| Tb1  | O5               | 2.296(18) | C1   | C2               | 1.49(3)   |
| Tb1  | O6 <sup>2</sup>  | 2.420(17) | C2   | C3               | 1.40(3)   |
| Tb1  | O6 <sup>1</sup>  | 2.645(16) | C2   | C4               | 1.38(3)   |
| Tb1  | O7               | 2.211(15) | C3   | C4 <sup>5</sup>  | 1.40(3)   |
| Tb1  | C5 <sup>1</sup>  | 2.98(2)   | C4   | C3 <sup>5</sup>  | 1.40(3)   |
| O1   | C1               | 1.29(3)   | C5   | Tb1 <sup>3</sup> | 2.98(2)   |
| O2   | Tb1 <sup>3</sup> | 2.304(15) | C5   | C6               | 1.48(3)   |
| O2   | C1               | 1.26(3)   | C6   | C7               | 1.44(3)   |
| O3   | C3               | 1.36(3)   | C6   | C8 <sup>6</sup>  | 1.39(3)   |
| O5   | Tb1 <sup>3</sup> | 2.455(16) | C7   | C8               | 1.40(3)   |
| O5   | C5               | 1.33(3)   | C8   | C6 <sup>6</sup>  | 1.39(3)   |

<sup>1</sup>3/2-X,-1/2+Y,1/2-Z; <sup>2</sup>+X,-1+Y,+Z; <sup>3</sup>3/2-X,1/2+Y,1/2-Z; <sup>4</sup>+X,1+Y,+Z; <sup>5</sup>1-X,1-Y,1-Z; <sup>6</sup>1-X,1-Y,-Z

**Table S18: Bond Angles for SION-1@H<sub>2</sub>O.**

| Atom            | Atom | Atom            | Angle/°  | Atom             | Atom | Atom             | Angle/°   |
|-----------------|------|-----------------|----------|------------------|------|------------------|-----------|
| O1              | Tb1  | O4              | 71.9(6)  | O7               | Tb1  | O6 <sup>1</sup>  | 141.0(5)  |
| O1              | Tb1  | O5 <sup>1</sup> | 87.9(7)  | O7               | Tb1  | C5 <sup>1</sup>  | 163.3(6)  |
| O1              | Tb1  | O6 <sup>1</sup> | 66.7(6)  | C1               | O1   | Tb1              | 142.3(16) |
| O1              | Tb1  | O6 <sup>2</sup> | 137.2(6) | C1               | O2   | Tb1 <sup>3</sup> | 140.4(16) |
| O1              | Tb1  | C5 <sup>1</sup> | 74.9(7)  | Tb1              | O5   | Tb1 <sup>3</sup> | 116.5(6)  |
| O2 <sup>1</sup> | Tb1  | O1              | 140.6(6) | C5               | O5   | Tb1              | 132.5(14) |
| O2 <sup>1</sup> | Tb1  | O4              | 143.8(6) | C5               | O5   | Tb1 <sup>3</sup> | 99.9(13)  |
| O2 <sup>1</sup> | Tb1  | O5 <sup>1</sup> | 79.2(5)  | Tb1 <sup>4</sup> | O6   | Tb1 <sup>3</sup> | 105.7(6)  |
| O2 <sup>1</sup> | Tb1  | O6 <sup>2</sup> | 71.5(6)  | C5               | O6   | Tb1 <sup>4</sup> | 158.9(15) |
| O2 <sup>1</sup> | Tb1  | O6 <sup>1</sup> | 76.8(5)  | C5               | O6   | Tb1 <sup>3</sup> | 94.2(14)  |
| O2 <sup>1</sup> | Tb1  | C5 <sup>1</sup> | 77.6(5)  | C7               | O7   | Tb1              | 138.8(15) |
| O4              | Tb1  | O5 <sup>1</sup> | 89.6(6)  | O1               | C1   | C2               | 117(2)    |
| O4              | Tb1  | O6 <sup>1</sup> | 120.8(6) | O2               | C1   | O1               | 122(2)    |
| O4              | Tb1  | O6 <sup>2</sup> | 72.4(6)  | O2               | C1   | C2               | 120(2)    |
| O4              | Tb1  | C5 <sup>1</sup> | 106.2(6) | C3               | C2   | C1               | 120(2)    |
| O5              | Tb1  | O1              | 81.0(6)  | C4               | C2   | C1               | 122(2)    |
| O5              | Tb1  | O2 <sup>1</sup> | 71.5(6)  | C4               | C2   | C3               | 118(2)    |

|                 |     |                 |          |                 |    |                  |           |
|-----------------|-----|-----------------|----------|-----------------|----|------------------|-----------|
| O5              | Tb1 | O4              | 142.7(6) | O3              | C3 | C2               | 123(2)    |
| O5              | Tb1 | O5 <sup>1</sup> | 115.0(4) | O3              | C3 | C4 <sup>5</sup>  | 119(2)    |
| O5              | Tb1 | O6 <sup>1</sup> | 67.6(5)  | C2              | C3 | C4 <sup>5</sup>  | 118(2)    |
| O5              | Tb1 | O6 <sup>2</sup> | 141.0(5) | C2              | C4 | C3 <sup>5</sup>  | 124(2)    |
| O5 <sup>1</sup> | Tb1 | O6 <sup>1</sup> | 49.6(5)  | O5              | C5 | Tb1 <sup>3</sup> | 54.2(10)  |
| O5              | Tb1 | C5 <sup>1</sup> | 90.4(6)  | O5              | C5 | C6               | 116.8(19) |
| O5 <sup>1</sup> | Tb1 | C5 <sup>1</sup> | 26.0(6)  | O6              | C5 | Tb1 <sup>3</sup> | 62.2(12)  |
| O6 <sup>2</sup> | Tb1 | O5 <sup>1</sup> | 69.0(6)  | O6              | C5 | O5               | 116.2(19) |
| O6 <sup>2</sup> | Tb1 | O6 <sup>1</sup> | 114.7(4) | O6              | C5 | C6               | 126(2)    |
| O6 <sup>2</sup> | Tb1 | C5 <sup>1</sup> | 93.3(6)  | C6              | C5 | Tb1 <sup>3</sup> | 166.4(16) |
| O6 <sup>1</sup> | Tb1 | C5 <sup>1</sup> | 23.6(6)  | C7              | C6 | C5               | 121(2)    |
| O7              | Tb1 | O1              | 106.2(7) | C8 <sup>6</sup> | C6 | C5               | 117(2)    |
| O7              | Tb1 | O2 <sup>1</sup> | 92.7(6)  | C8 <sup>6</sup> | C6 | C7               | 122(2)    |
| O7              | Tb1 | O4              | 89.7(6)  | O7              | C7 | C6               | 122(2)    |
| O7              | Tb1 | O5 <sup>1</sup> | 164.9(6) | O7              | C7 | C8               | 122(2)    |
| O7              | Tb1 | O5              | 73.5(6)  | C8              | C7 | C6               | 116(2)    |
| O7              | Tb1 | O6 <sup>2</sup> | 96.5(6)  | C6 <sup>6</sup> | C8 | C7               | 122(2)    |

<sup>1</sup>3/2-X,-1/2+Y,1/2-Z; <sup>2</sup>+X,-1+Y,+Z; <sup>3</sup>3/2-X,1/2+Y,1/2-Z; <sup>4</sup>+X,1+Y,+Z; <sup>5</sup>1-X,1-Y,1-Z; <sup>6</sup>1-X,1-Y,-Z



## S3 Structural Topologies of SION-2 and SION-1

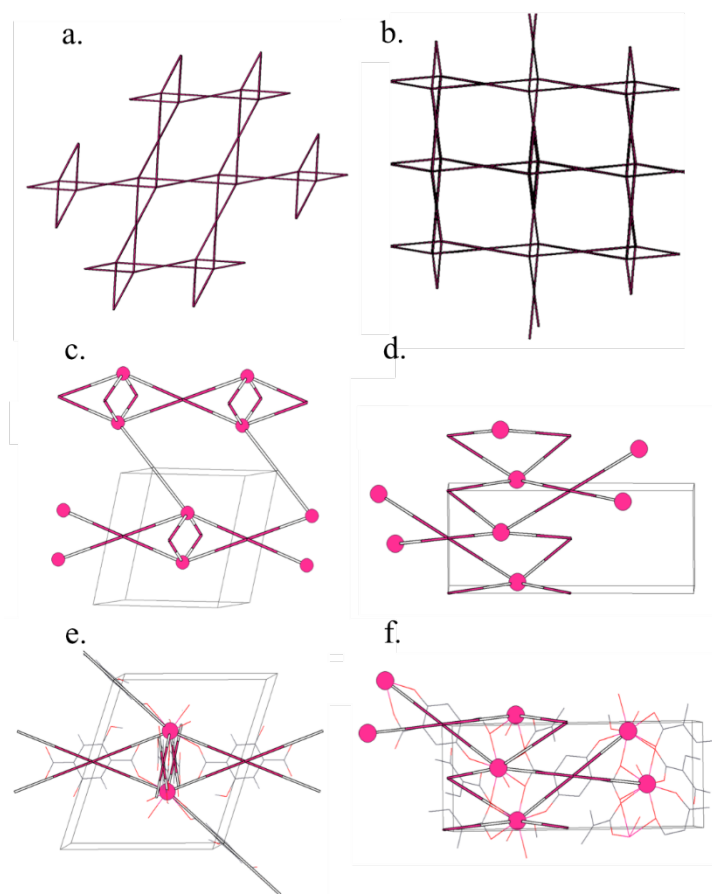

**Figure S6:** Network topologies of a. *lvt* of SION-1, b. *xah* of SION-2 along the *c*-axis., c. projection of the *xah* net approximately along the *a*-axis, d. projection of the *lvt* net approximately along the *a*-axis. e. the *xah* net with SION-2 superposed in the background. f. the *lvt* net with SION-1 superposed in the background. Tb(III) ions are represented as purple balls, while the organic ligands are represented as purple and white lines.

## S4 Solid State Characterization

### S4.1 Phase purity

The phase purity of **SION-1**, **SION-2**, **SION-1@H<sub>2</sub>O** and **SION-2@H<sub>2</sub>O** was confirmed by the comparison of the experimental PXRD pattern with the simulated generated from the single crystal structure. **SION-1** and **SION-2** and it is found that are stable over a period of 6 months at ambient temperature while stored in a vial.

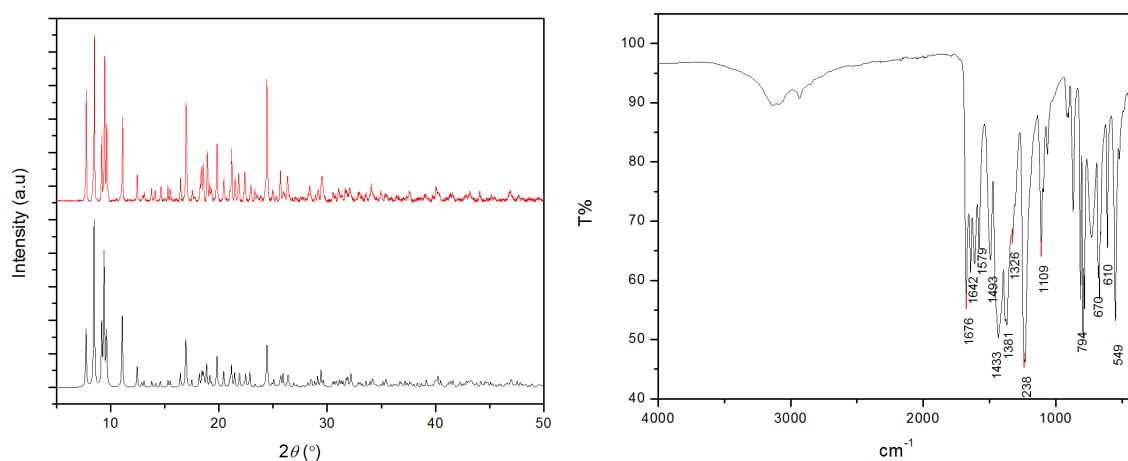

**Figure S7:** Left, PXRD of **SION-2**, color scheme: black, theory; red, experimental. Right, IR of **SION-2**. Both spectrum were obtained after conventional heating experiments.

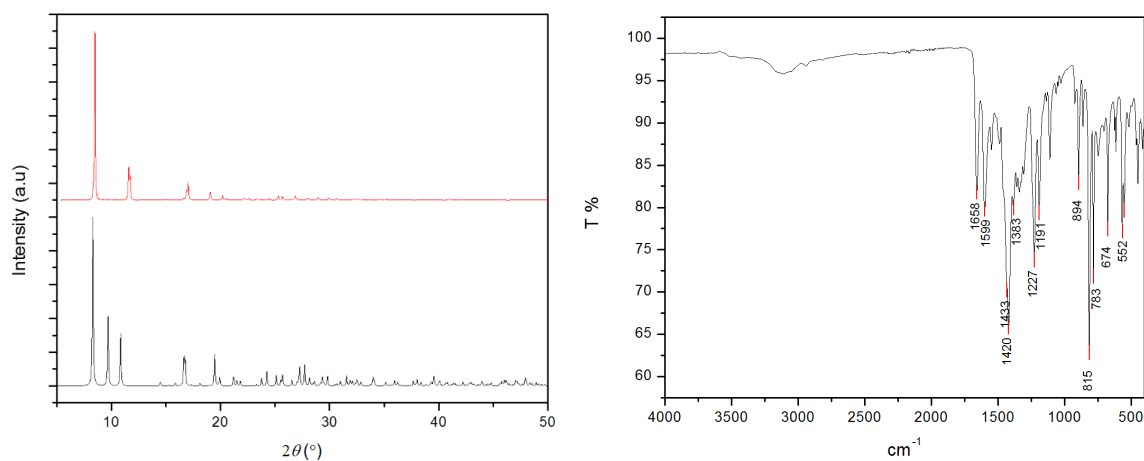

**Figure S8:** Left, PXRD of **SION-1**, color scheme: black, theory; red, experimental. Right, IR of **SION-1**. Both spectra were obtained after conventional heating experiments.

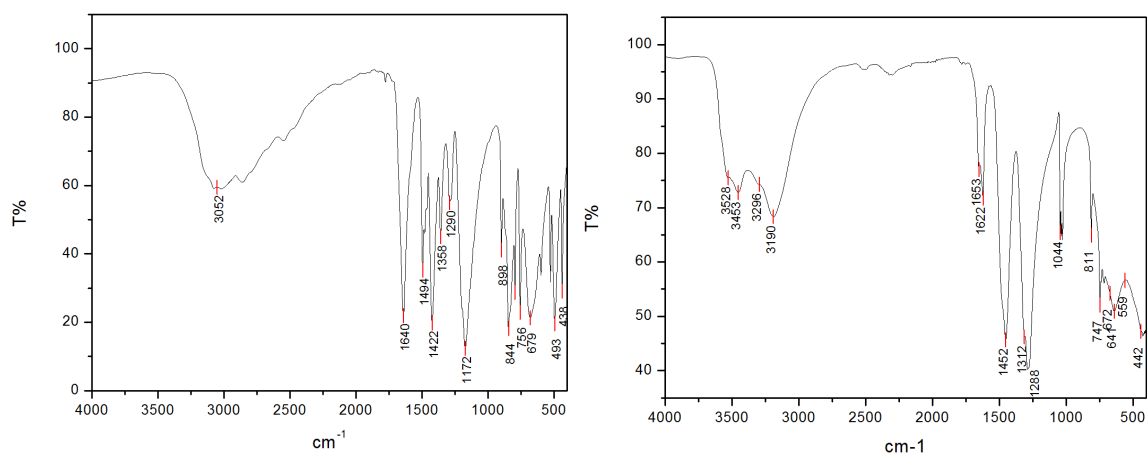

**Figure S9:** Left: IR of the ligand, DHBDC; Right: IR of the metal salt  $\text{Tb}(\text{NO}_3)_3 \cdot 6\text{H}_2\text{O}$

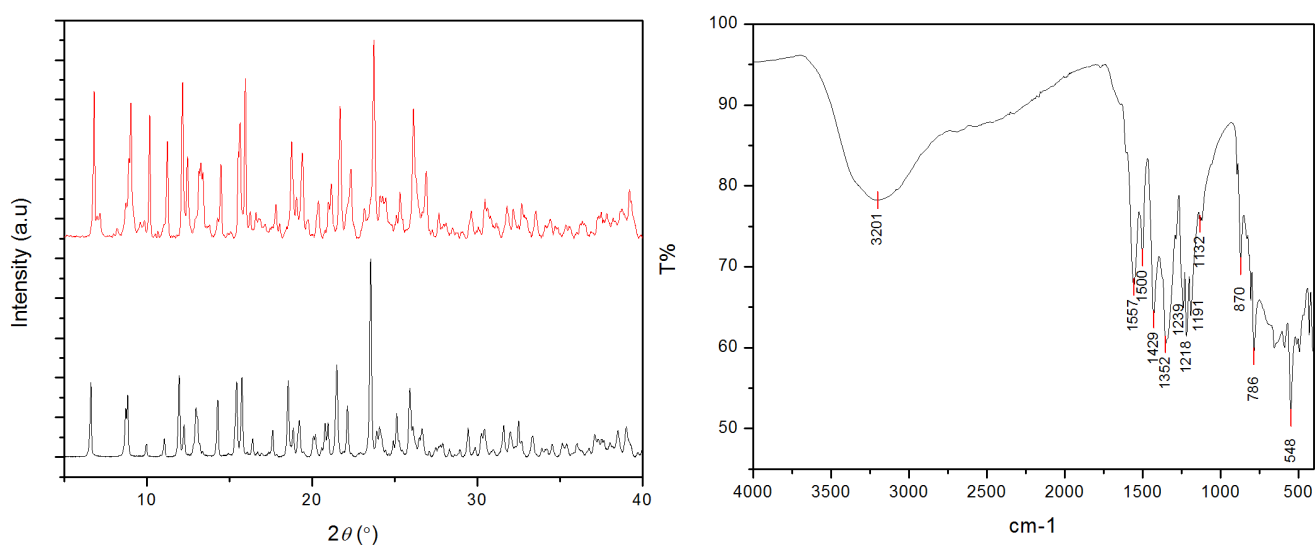

**Figure S10:** PXRD of  $\text{SION-2@H}_2\text{O}$  after  $\text{SION-2}$  has been immersed in  $\text{H}_2\text{O}$  for 72 hrs (left) and the respective IR of  $\text{SION-2@H}_2\text{O}$  (right). Color scheme for PXRD: black,  $\text{SION-2@H}_2\text{O}$  theory; red, experimental.

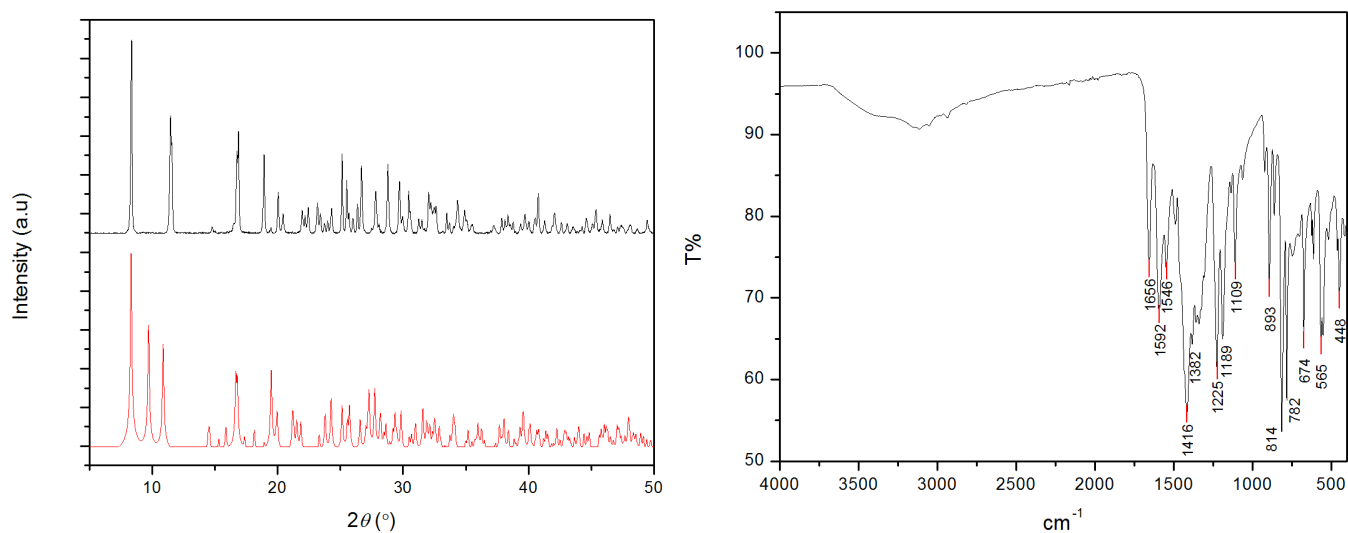

**Figure S11:** PXRD of **SION-1@H<sub>2</sub>O** after **SION-1** has been immersed in **H<sub>2</sub>O** for 72 hrs, color scheme: theoretical red; experimental, black. The respective IR of **SION-1@H<sub>2</sub>O** is on the right.

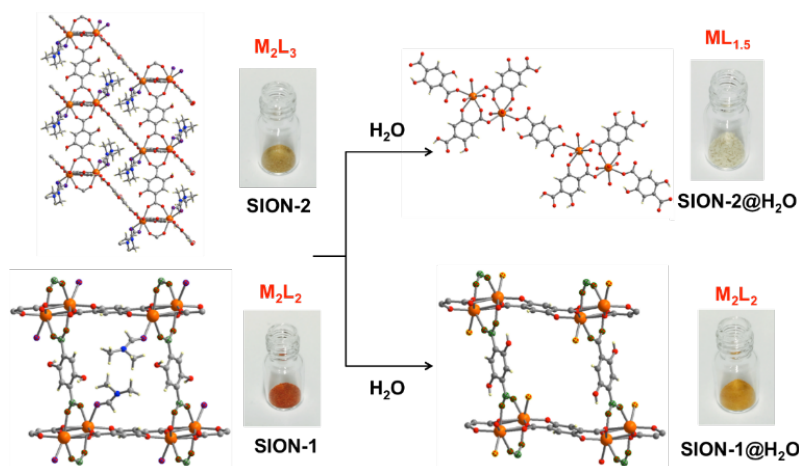

**Figure S12.** Schematic illustration showing how the structures of **SION-1** and **SION-2** are affected when are immersed in water. The 3-dimensional structure of **SION-2** collapses into 1-dimensional chains of **SION-2@H<sub>2</sub>O**. The structure of **SION-1** retains its structural integrity when is immersed in **H<sub>2</sub>O**, but **H<sub>2</sub>O** molecules displace the coordinated guest DMF molecules. Atom colours: orange, Tb; red, O; blue, N; grey, C; pale yellow, H. In **SION-1** and **SION-1@H<sub>2</sub>O**, red and grey with green cross, carboxylate C and O of DHBDC; red with blue cross, O of DMF and red with yellow cross, O of **H<sub>2</sub>O**.

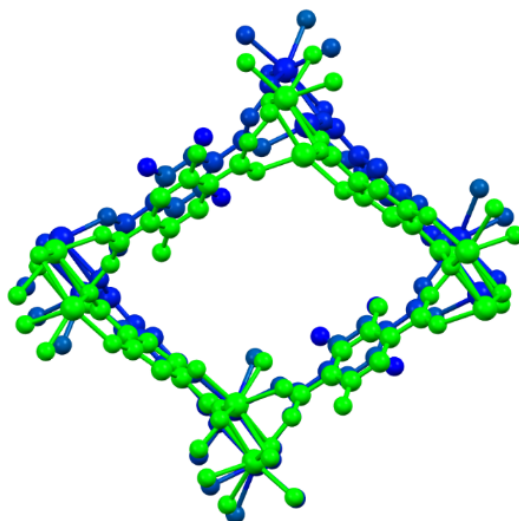

**Figure S13:** Pore shrinkage from SION-1 to SION-1 @ H<sub>2</sub>O. Here, blue represents SION-1 while green is SION-1@H<sub>2</sub>O.

#### S4.2 Thermogravimetric Analysis

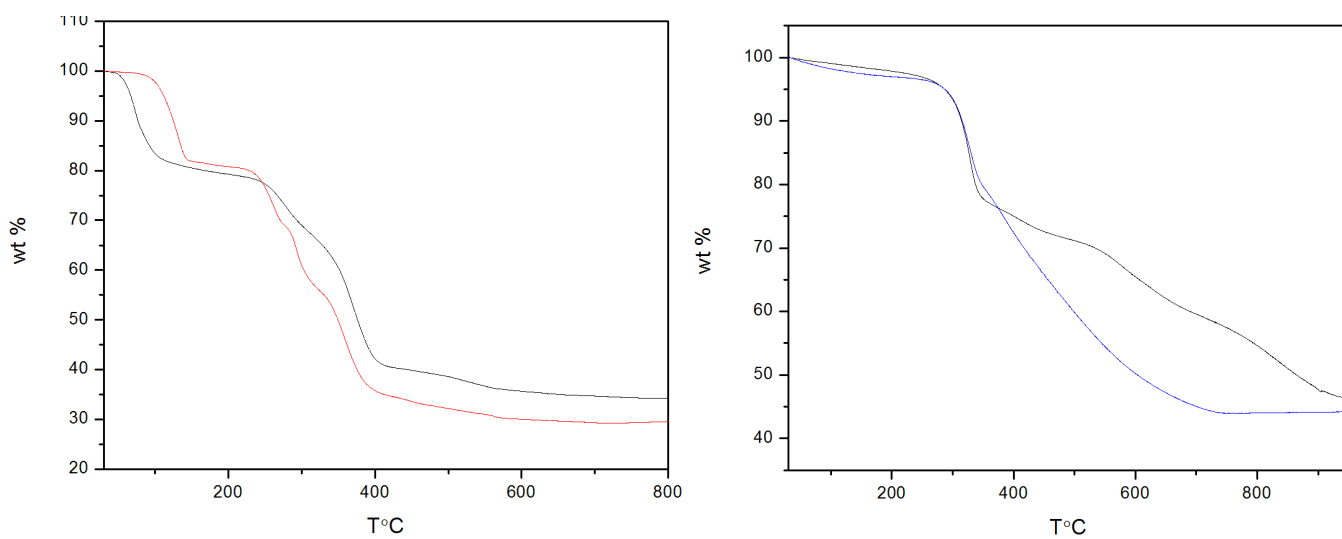

**Figure S14:** TGA analysis of SION-2@H<sub>2</sub>O, and SION-2 (left) as well as SION-1@H<sub>2</sub>O and SION-1 (right). Color scheme: SION-2, red; SION-2@H<sub>2</sub>O, black (left). SION-1, black; SION-1@H<sub>2</sub>O, blue (right).

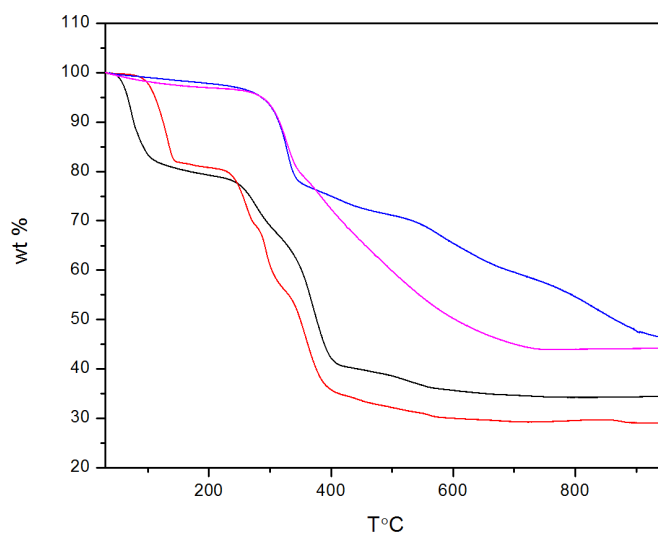

**Figure S15:** Combined TGA of the SION family, color scheme: **SION-2**, red; **SION-2@H<sub>2</sub>O**, black; **SION-1**, blue; **SION-1@H<sub>2</sub>O**, pink.

TGA shows that **SION-2@H<sub>2</sub>O** is less thermally stable compared to **SION-2**, with an initial weight loss of 18% at 60°C corresponding to the loss of H<sub>2</sub>O, followed by total decomposition of the material at 250 °C. The TGA profile of **SION-1@H<sub>2</sub>O** is very comparable to that of **SION-1**, with an initial weight loss of 4 % corresponding to H<sub>2</sub>O at 313 °C, followed by the slow decomposition of the material at 343 °C

#### **S4.3 Effects of concentration on formation of SION-2 and SION-1**

Following the conditions described above for the synthesis of **SION-1** using conventional solvothermal synthesis, with the exception of the volume of DMF added which ranged from 1.0 to 2.2 mL of DMF in 0.1 mL increments. Vials were capped, and placed in the oven using the same temperature and ramping scheme for 72 hrs. Once the vials were removed, the material was filtered, washed with fresh DMF, and allowed to dry in air.

#### **S4.4 Effects of Time on the Formation of SION-2 and SION-1**

Following the conditions described above for the synthesis of **SION-1** using conventional solvothermal synthesis, vials were capped, and placed in the oven using the same temperature and

*Anderson et al.*

ramping scheme for their allotted times of 12, 24, 48, 52, 62, and 65 hrs. Once the vials were removed, the material was filtered, washed with fresh DMF, and allowed to dry in air.

#### **S4.5 SION-2 to SION-1 (direct, 72 hrs)**

Following the conditions described above for the synthesis of **SION-2** using conventional solvothermal synthesis, vials were capped, and placed in the oven using the same temperature and ramping scheme for 24 hrs to form fresh **SION-2**. After formation, the material was washed with fresh DMF. Finally, 2 mL of DMF and 0.5 mL H<sub>2</sub>O was added to the vial, capped, and placed in an oven using the same ramping conditions described above. Original golden colored crystal emerged bright orange.

#### **S4.6 Single-crystal to Single-Crystal transformation test: Wet vs Dry SION-2**

To test to see if the transformation between **SION-2** and **SION-1** was single-crystal to single-crystal, fresh **SION-2** (previously made via conventional heating conditions previously described) was dried overnight on a filter paper and placed in a vial, thus affording dry crystals. In a separate vial, fresh **SION-2** was made, and washed with DMF until clear. Any solvent present in the vial was removed with a pipette, this leaving behind “wet” crystals. Both vials were capped, and placed in the oven for 72 hrs using the same ramping and cooling process described in the conventional heating section.

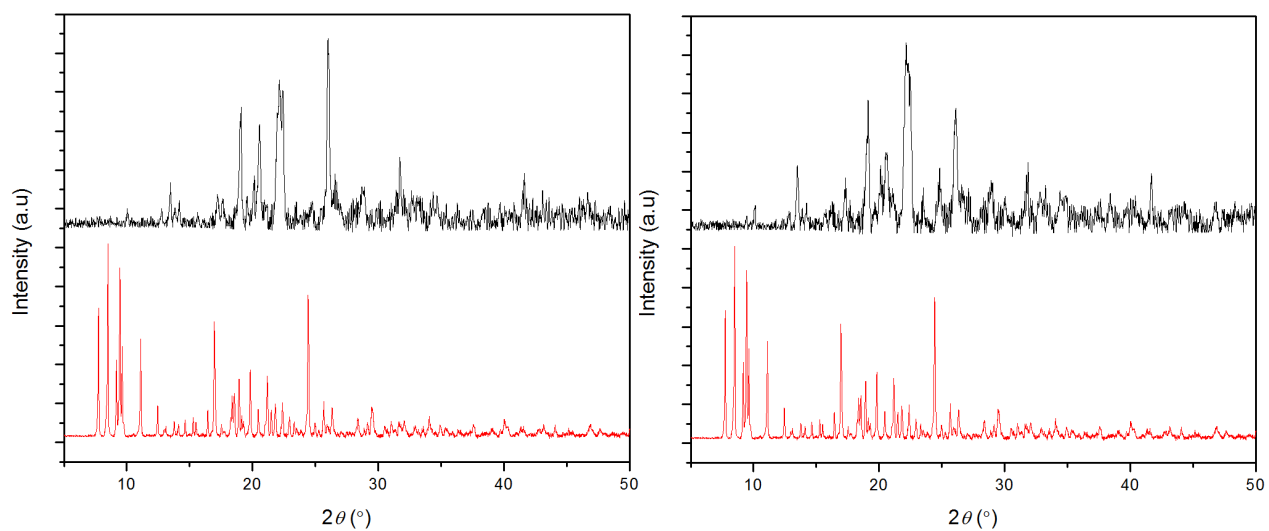

**Figure S16:** In order to rule out single-crystal to single-crystal transformation in air from **SION-2** to **SION-1** using material that had been previously dried (left) and material that had been just removed from solvent ("wet") but not dried (right). Color scheme: **SION-2** Theory, red; dry/wet material after heating, black.



## S5 *In-situ* $^1\text{H}$ NMR experiments

Approximately 12 mg of newly synthesized **SION-2** was washed 3 times with a total of 0.5 mL of  $d_4$ -DMF. The solid was transferred into a standard NMR tube with 0.5 mL of  $d_4$ -DMF, 0.125 mL of  $\text{D}_2\text{O}$ , and 10  $\mu\text{L}$  of *p*-xylenes (internal standard). The NMR tube was flame sealed to ensure no evaporation of liquids, and placed into a 400 MHz Bruker NMR. The internal NMR temperature was set to 120  $^\circ\text{C}$  and allowed to stabilize until no more movement was observed by the hydroxide peaks present in the spectrum. Subsequently a  $^1\text{H}$  NMR spectrum was taken every 15 minutes for approximately 65 hrs. Using an algorithm/script through Mestrenova (see section 8 of the SI), the movement of peaks, as well as their concentration were calculated.

General calculations for the percentage of ligand lost were performed by using the formula to determine the overall percentage of ligand found in **SION-2** that could be lost ( $2.7 \times 10^{-5}$  mols, average  $\sim 12$  mg **SION-2** used). This percentage represents the total dissolution of the MOF during the transformation process. Through algorithm/script generated from Mestrenova, a maximum concentration of ligand released is calculated using the known (10  $\mu\text{L}$ ) volume of *p*-xylenes added. From that concentration (0.043 mol/l for  $2.7 \times 10^{-5}$  mols), and the known volume inside the NMR tube (0.626 mL), the moles of ligand is found. Finally, compared to the total amount that could be released  $1.0 \times 10^{-5}$  mols, or 37 % of the total amount of ligand was found in solution, representing a partial dissolution.

### S5.1 **SION-2 to SION-1 transformation for NMR comparison**

Following the NMR experiments, **SION-2** was made through MW synthesis and washed with DMF until the solvent was clear. The material was placed in a vial, along with 2 mL of DMF and 0.5 mL of  $\text{H}_2\text{O}$ . The vials were placed in the oven using the conditions described above for their allotted times (1, 5, 10, 14, 18, 20, 24, and 48 hrs). Once the vials were removed, the material was filtered, washed with fresh DMF, and allowed to dry in air. PXRD was performed on each sample to determine what was happening during the NMR experiments.

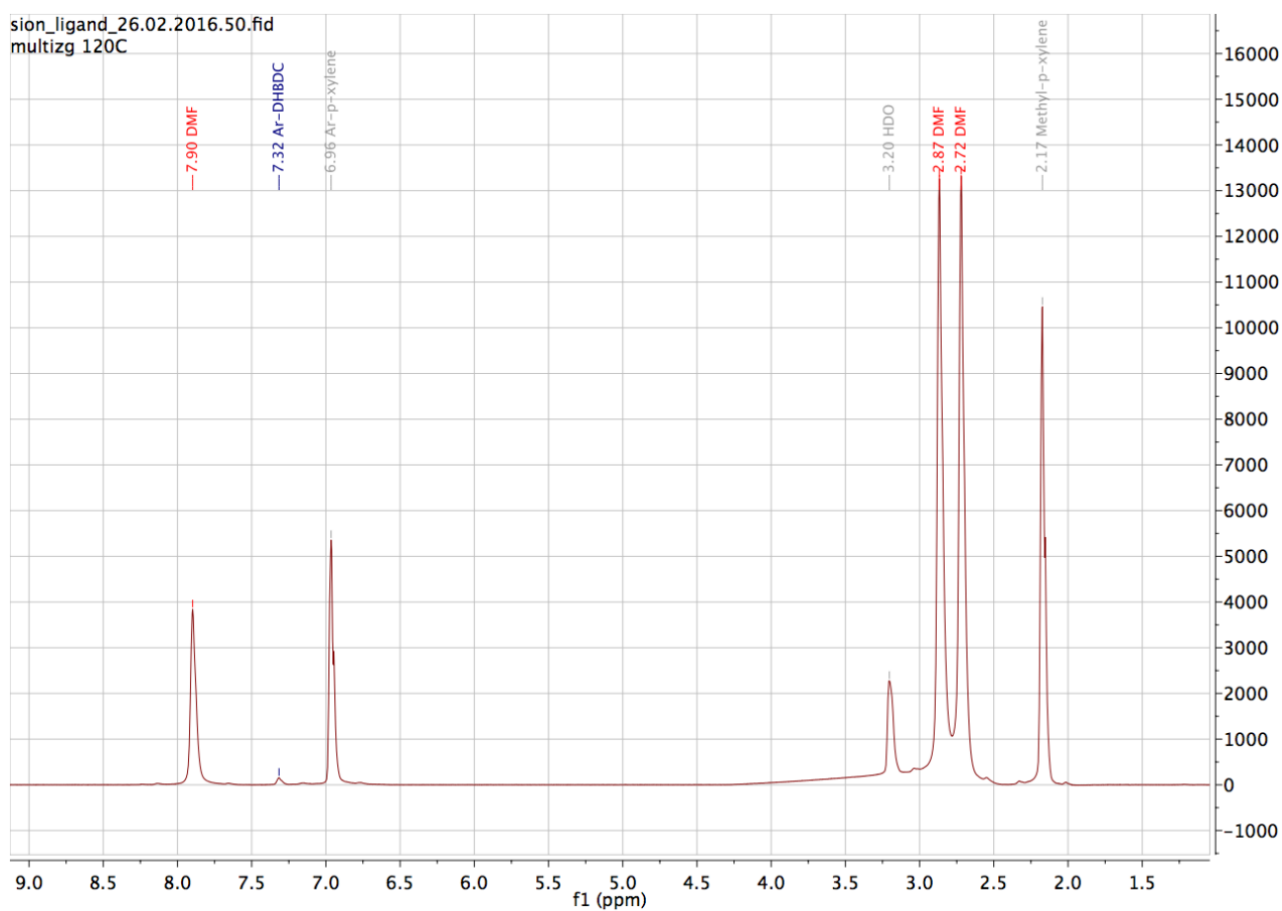

Figure S17: Initial scan of DHBDC in *d*<sub>4</sub>-DMF/D<sub>2</sub>O at 120°C.

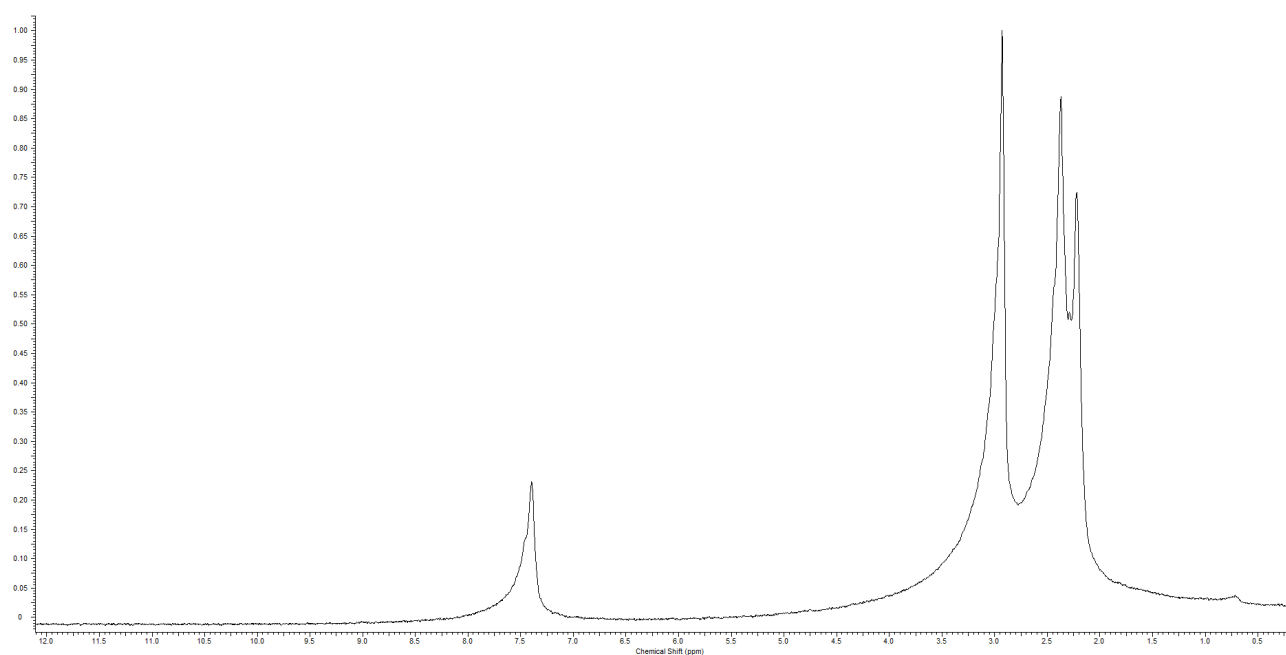

Figure S18: Initial scans of SION-2 (only) at 120°C. The peaks here correspond to *d*<sub>4</sub>-DMF (~7.5 ppm and ~2.0-2.5 ppm) and H<sub>2</sub>O/D<sub>2</sub>O (~ 3.0 ppm).

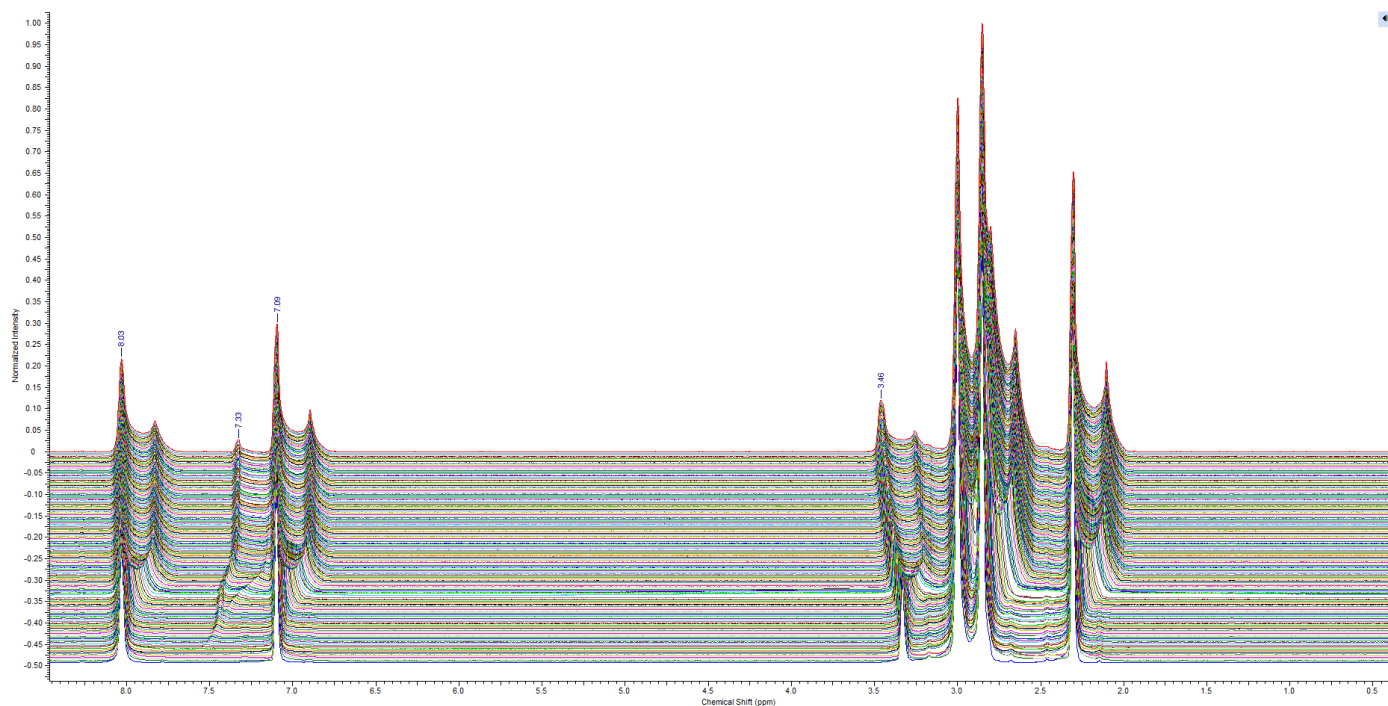

**Figure S19:** 30 minute interval  $^1\text{H}$  NMR scans of **SION-2** at  $120^\circ\text{C}$ . Starting from the bottom (-0.50, y axis) is time 0, following through to the top (0.0, y axis) for 62 hrs. Peaks at 8.03 ppm and 2.5-3.0 ppm correspond to  $d_4$ -DMF, while peaks at 7.09 ppm and between 2.0-2.4 ppm correspond to the *p*-xylene internal standard added in (10  $\mu\text{L}$ ). The peak at 3.46 represents  $\text{H}_2\text{O}/\text{D}_2\text{O}$ , while the one that starts at approximately 7.60-7.33 represents the evolution of DHBDC from the framework **SION-2** into the solvent while the framework changes to **SION-1**.

## S6 ICPMS

The ICPMS experiments were performed under the assumption that the pathway occurs through a partial dissolution mechanism. Using a Tb standard (TraceCERT, 1000 mg/L Tb in HNO<sub>3</sub> purchased from Sigma Aldrich), a calibration curve with 200 µg/L, 50 µg/L, 20 µg/L, 18 µg/L, 10 µg/L, 2 µg/L, and 0.2 µg/L values was initially constructed.

Samples of freshly prepared **SION-2** (MW synthesis) were washed with fresh DMF until the solution was clear, and 2.0 mL of DMF and 0.5 mL of H<sub>2</sub>O were added with an Eppendorf pipette. These samples were placed in the oven for 5, 10, 14, 16, 18, 24, 35, 48 and 72 hrs. Following the allotted reaction time, 6.41 µL of solvent was removed from the reactions, and placed in a 100 mL volumetric flask and diluted and immediately analyzed on the ICPMS.

## S7 In-situ PXRD study

*In-situ* Synchrotron X-ray powder diffraction was performed at the Swiss Norwegian Beamlines SNBL of ESRF (European Synchrotron Radiation Facility), at beamline BM31. Preformed **SION-2** crystals were ground in a DMF/H<sub>2</sub>O mixture and loaded into a 0.8 mm quartz capillary, which was heated with a hot air blower (ramp of 2 °C /min to 120 °C). Data were collected at 60s exposure time with a mar345 area detector, using a wavelength of 0.5008 Å and after having performed a previous calibration of the setup with a Lab6 standard. Data integration was performed with Bubble. Lattice parameters were then extracted by means of profile fits (Le Bail) using the Topas software.

## S8 Computational Methods

The relative energies of **SION-1** and **SION-2** were calculated subtracting the sum of the energy of each individual atom ( $nE_{\text{Tb}} + nE_{\text{C}} + nE_{\text{O}_2} + nE_{\text{H}_2} + nE_{\text{N}_2}$ ) from the total energies of the pure crystal structure ( $E_{\text{AB}}$ ); the energy of each atom was obtained dividing the total energy of its standard state (i.e. Tb (s, hcp phase), C (s, hcp phase), O<sub>2</sub>(g), H<sub>2</sub>(g), N<sub>2</sub>(g)) by the number of atoms in the respective unit cell (Tb=2, C=4, O=2, H=2, N=2).

Electronic structure calculations were performed out on the periodic crystals in the VASP (Vienna ab-initio Simulation Program) code at GGA DFT level of theory using the PBEsol functional.<sup>5</sup> Projector-augmented wave (PAW) potentials were used for modeling the interactions between core and shell of the atoms, projector-augmented wave. The geometries were optimized at  $\Gamma$ -point relaxing both the atomic positions and the cell parameters converging the forces to 0.005 eV/Å and the electronic structure to  $10^{-7}$  eV. The bonding energies were calculated removing one ligand from the crystal and subtracting the total energy the crystal fragment ( $E_A^{x+}$ ) and of the removed ligand ( $E_B^{x-}$ ) from the one of the pure crystal ( $E_{AB}$ ).

## S9 References

1. Bruker AXS Inc. Apex 3, M., WI, 2015 (Madison, WI; 2015).
2. Bruker AXS Inc. SADABS Version 2014, M., WI (Madison, WI; 2014).
3. Dolomanov, O.V., Bourhis, L.J., Gildea, R.J., Howard, J.A.K. & Puschmann, H. OLEX2: a complete structure solution, refinement and analysis program. *J. App. Crystallogr.* **42**, 339-341 (2009).
4. Sheldrick, G. Crystal structure refinement with SHELXL. *Acta Crystallogr. Sec.C* **71**, 3-8 (2015).
5. Perdew, J.P. et al. Restoring the Density-Gradient Expansion for Exchange in Solids and Surfaces. *Phy. Rev. Lett.* **100**, 136406 (2008).
